# Supplementary material for: The effect of biomolecular corona on adsorption onto and desorption from a model lipid membrane
Source: Royal Society of Chemistry journal article supplement (doi:10.1039/d2nr05296b), 2022-12-06
Supplement: d2nr05296b1.xlsx [file d2nr05296b1.xlsx]

## Sheet: Tabelle1
Particle heights as measured by AFM
100 Pristine					100 Hard Corona					100 Full Corona					40 Full Corona					20 Full Corona					40 Pristine					20 Pristine
	experiment	image id	d (nm)			experiment	image id	d (nm)			experiment	image id	d (nm)			experiment	image id	d (nm)			experiment	image id	d (nm)			experiment	image id	d (nm)			experiment	image id	d (nm)
1	2020-10-29	12.43.52	105		1	2020-12-16	11.38.33	104.7		1	2021-01-05	14.14.50	109.3		1	2021-01-22	15.27.25	46.7		1	2021-03-02	13.41.43	22.7		1	2021-03-31	09.25.09	25		1	2021-03-23	13.07.34	23.7
2	2020-11-03	12.30.15	94.1		2	2020-12-16	11.40.24	112.1		2	2021-01-05	14.11.06	104.6		2	2021-01-22	15.29.30	47.5		2	2021-03-02	13.47.16	25.7		2	2021-03-31	09.26.38	42.3		2	2021-03-23	13.09.25 P1	16.3
3	2020-11-03	12.39.34	83.1		3	2020-12-16	11.42.16	103.4		3	2021-01-05	14.18.34	92.5		3	2021-01-22	15.31.21	33.7		3	2021-03-02	13.49.07	32.7		3	2021-03-31	09.28.02 P1	38.8		3	2021-03-23	13.09.25 P2	17.1
4	2020-11-03	12.42.02	91.7		4	2020-12-16	11.45.58	105.9		4	2021-01-05	14.20.26	111.1		4	2021-01-22	15.33.13	48.2		4	2021-03-02	13.50.58	20.3		4	2021-03-31	09.28.02 P2	39.1		4	2021-03-23	13.11.16	29.4
5	2020-11-03	12.44.28	101		5	2020-12-16	11.54.57	116.7		5	2021-01-05	14.22.18	100		5	2021-01-22	15.36.23	58.3		5	2021-03-02	13.52.47	29.7		5	2021-03-31	09.29.44	43.1		5	2021-03-23	13.13.06	14.8
6	2020-11-03	12.46.54	88.5		6	2020-12-16	12.00.32	105.4		6	2021-01-05	14.26.09	121.1		6	2021-01-22	15.38.15	43.7		6	2021-03-02	13.54.38	31.6		6	2021-03-31	09.36.51 P1	29.3		6	2021-03-23	13.14.5	12.3
7	2020-11-03	12.49.21	103		7	2020-12-16	12.02.25	107		7	2021-01-05	15.03.32 P1	108.7		7	2021-01-22	16.10.58	43		7	2021-03-02	13.56.29	23.5		7	2021-03-31	09.36.51 P2	39.7		7	2021-03-23	13.16.19 P1	18.7
8	2020-11-03	12.51.46	84.4		8	2020-12-16	12.04.17	111.2		8	2021-01-05	15.03.32 p2	103.6		8	2021-01-22	16.12.49 P1	39.6		8	2021-03-02	13.58.19	29.5		8	2021-03-31	09.38.15	27.3		8	2021-03-23	13.16.19 P2	14.7
9	2020-11-20	15.38.51	113.5		9	2020-12-16	12.06.9	83.8		9	2021-01-05	15.27.12	103.3		9	2021-01-22	16.12.49 P2	53.8		9	2021-03-02	14.00.09	24.4		9	2021-03-31	09.39.32	34		9	2021-03-23	13.26.36	20.9
10	2020-11-20	15.42.57	102.6		10	2020-12-16	12.08.00	109.6		10	2021-01-05	15.30.24	104.8		10	2021-01-22	16.12.49 P3	52.6		10	2021-03-02	14.05.40	31.9		10	2021-03-31	09.42.25	30.7		10	2021-03-23	13.35.46	21.3
11	2020-11-20	15.42.57	107.3		11	2020-12-16	12.11.44	125.7		11	2021-01-05	15.32.16	95.9		11	2021-01-22	16.14.41	49.9		11	2021-03-02	14.07.30	29.4		11	2021-03-31	09.45.49	34.9		11	2021-03-23	13.37.24	19.6
12	2020-11-20	15.50.04	96		12	2020-12-16	12.13.36	94.77		12	2021-01-15	14.46.20	102.9		12	2021-01-22	16.16.32	43.9		12	2021-03-02	14.09.14 P1	27.6		12	2021-03-31	09.47.24	30.9		12	2021-03-23	13.39.02	19
13	2020-11-20	15.58.47	99.3		13	2020-12-16	12.15.28	106.5		13	2021-01-15	14.50.03	104.2		13	2021-01-22	16.20.12	41		13	2021-03-02	14.09.14 P2	26.3		13	2021-03-31	09.49.10	35.4		13	2021-03-23	13.45.4	24.5
14	2020-11-20	16.09.43	87.8		14	2020-12-16	12.18.35	113.4		14	2021-01-15	14.51.56	108.7		14	2021-01-22	16.23.54 P1	41.1		14	2021-03-02	14.10.52	30.5		14	2021-03-31	10.03.30 P1	39		14	2021-03-23	13.47.11	14.6
15	2020-11-20	16.13.19	96.4		15	2020-12-16	12.20.26	102.2		15	2021-01-15	14.55.39	110.3		15	2021-01-22	16.23.54 P2	36		15	2021-03-02	14.12.43	28.2		15	2021-03-31	10.03.30 P2	30.2		15	2021-03-23	13.48.19	12.7
16	2020-11-20	16.13.19	98.2		16	2020-12-16	12.22.18	99.4		16	2021-01-15	14.57.31	95.8		16	2021-01-22	16.25.46	41.8		16	2021-03-02	14.14.34	23.4		16	2021-03-31	10.05.00	26.3		16	2021-03-23	13.49.29	19.4
17	2020-11-20	16.15.18	86		17	2020-12-16	12.24.09	98.6		17	2021-01-15	15.00.30	106.7		17	2021-01-22	16.31.23	49.5		17	2021-03-02	14.16.06 P1	27.5		17	2021-03-31	10.06.14	27.2		17	2021-03-23	13.50.54	12.7
18	2020-11-20	16.18.19	96.2		18	2020-12-16	12.27.52	95.3		18	2021-01-15	15.03.52	110.9		18	2021-01-22	16.36.11	45.8		18	2021-03-02	14.16.06 P2	53.4		18	2021-03-31	10.07.41	24.2		18	2021-03-23	13.52.17	11.4
19	2020-11-20	16.24.20	105.1		19	2021-02-23	11.58.31	104.7		19	2021-01-15	15.05.43	101.2		19	2021-01-22	16.39.55 P1	52		19	2021-03-02	14.16.06 P3	46.8		19	2021-03-31	10.10.12	24.4		19	2021-03-23	13.54.2	18.2
20	2020-11-20	17.01.12	93.1		20	2021-02-23	12.04.7 P1	105.7		20	2021-01-15	15.13.08	109		20	2021-01-22	16.39.55 P2	55.5		20	2021-03-02	14.23.14	32.3		20	2021-03-31	10.11.31	32.8		20	2021-03-23	13.55.50 P1	24.1
21	2020-11-20	17.03.04	90		21	2021-02-23	12.04.7 P2	94.7		21	2021-01-15	15.15.02	98.1		21	2021-01-22	16.41.47	45.7		21	2021-03-02	14.25.04	34.7		21	2021-03-31	10.13.12	28.7		21	2021-03-23	13.55.50 P2	20.1
22	2020-11-20	17.04.57	95.6		22	2021-02-23	12.07.30	95.8		22	2021-01-15	15.21.41	115.3		22	2021-01-22	16.43.44	38.9		22	2021-03-02	14.26.55	21.1		22	2021-03-31	10.15.17	47.4		22	2021-03-23	13.57.37	18.1
23	2020-11-20	17.04.57	88.3		23	2021-02-23	12.09.28	104.8		23	2021-01-15	15.25.21	113.8		23	2021-01-22	16.49.17	33		23	2021-03-02	14.28.28	33.9		23	2021-03-31	10.16.38	23.5		23	2021-03-23	13.58.55	15.5
24	2020-11-20	17.09.50	93.2		24	2021-02-23	12.12.41	105.7		24	2021-01-15	15.29.03	98.2		24	2021-01-22	16.51.08 P1	55.4		24	2021-03-02	14.29.53	39.4		24	2021-03-31	10.18.06	29.3		24	2021-03-23	14.01.10	14.3
25	2020-11-20	17.29.03	97.6		25	2021-02-23	12.14.32	98.9		25	2021-01-15	15.33.51	110.1		25	2021-01-22	16.51.08 P2	32.5		25	2021-03-02	14.31.13	26.8		25	2021-03-31	10.19.22	33.5		25	2021-03-23	14.05.15	21.2
26	2020-11-20	17.29.03	88.4		26	2021-02-23	12.38.05	95.8		26	2021-01-15	15.35.42	106.2		26	2021-01-22	16.58.13	39.3		26	2021-03-02	14.32.37	23.4		26	2021-03-31	10.20.40 P1	45.7		26	2021-03-23	14.06.42	13.6
27	2020-11-20	17.29.03	88.2		27	2021-02-23	12.41.48 P1	89.9		27	2021-01-15	15.41.17	102.4		27	2021-01-22	17.00.04	40.9		27	2021-03-02	14.36.01 P1	23.1		27	2021-03-31	10.20.40 P2	38.1		27	2021-03-23	14.07.51	17.4
28	2020-11-20	17.31.06	91.8		28	2021-02-23	12.41.48 P2	108.6		28	2021-01-15	15.43.08	100.8		28	2021-01-22	17.03.53	41.2		28	2021-03-02	14.36.01 P2	26.3		28	2021-03-31	10.20.40 P3	44.1		28	2021-03-23	14.09.02	11.9
29	2020-11-20	17.34.10	92.7		29	2021-02-23	12.39.56	107.6		29	2021-01-15	15.52.29 P1	120.9		29	2021-01-22	17.05.46	40.7		29	2021-03-02	14.39.21	30.6		29	2021-03-31	10.38.43	41.8		29	2021-03-23	14.10.12	20.5
30	2020-11-20	17.36.02	88.8		30	2021-02-23	12.06.45 P1	112.9		30	2021-01-15	15.52.29 P2	129.6		30	2021-01-22	17.09.28 P1	52.6		30	2021-03-02	14.41.10 P1	31		30	2021-03-31	10.40.23	27.7		30	2021-03-23	14.11.22	18.8
31	2020-11-20	18.01.47	99.4		31	2021-02-23	12.06.45 P2	118		31	2021-01-15	15.52.29 P3	103.1		31	2021-01-22	17.09.28 P2	44.5		31	2021-03-02	14.41.10 P2	20.1		31	2021-03-31	10.41.59	26.6		31	2021-03-23	14.12.33	10.4
32	2020-11-20	18.03.39	102.5		32	2021-02-23	12.06.45 P3	110.8		32	2021-01-15	15.52.29 P4	91.9		32	2021-01-22	15.20.46	51.1		32	2021-03-02	14.43.09 P1	21.7		32	2021-03-31	10.43.31	27.4		32	2021-03-23	14.13.38	8.1
33	2020-11-20	18.05.32	110.5		33	2021-02-23	12.27.18	108.2		33	2021-01-15	15.56.14	115.1		33	2021-01-22	17.15.02	37.1		33	2021-03-02	14.43.09 P2	35.2		33	2021-03-31	10.44.58	39.3		33	2021-03-23	14.14.46	15.1
34	2020-11-20	18.07.25	104.2		34	2021-02-23	12.29.10	121.2		34	2021-01-15	15.58.06 P1	91.05		34	2021-01-22	17.18.44	41.8		34	2021-03-02	14.43.09 P3	20.4		34	2021-03-31	10.46.23	52		34	2021-03-23	14.18.09	17.1
35	2020-11-20	18.07.25	87.4		35	2021-02-23	12.49.56	107.7		35	2021-01-15	15.58.06 P2	93.4		35	2021-01-22	17.22.28	44.4		35	2021-03-02	14.43.09 P4	23.4		35	2021-03-31	10.51.32	36.7		35	2021-03-23	14.19.21	11.4
36	2020-11-20	18.07.25	91.7		36	2021-02-23	12.51.48	104.2		36	2021-01-15	16.04.12	99.5		36	2021-01-22	17.26.10	37.1		36	2021-03-02	14.50.13	29.1		36	2021-03-31	10.52.50 P1	39.8		36	2021-03-23	14.21.09	11.2
37	2020-11-20	18.09.18	88.9		37	2021-02-23	12.55.29 P1	101.6		37	2021-01-15	16.06.03	145		37	2021-01-22	17.28.02	34.5		37	2021-03-02	14.53.36	30.5		37	2021-03-31	10.52.50 P2	33.6		37	2021-03-23	14.23.16 P1	18.1
38	2020-11-20	18.09.18	87		38	2021-02-23	12.55.29 P2	110.9		38	2021-01-15	16.11.42	108.5		38	2021-01-22	17.29.53	51.4		38	2021-03-02	14.56.24 P1	27		38	2021-03-31	10.54.24	24.3		38	2021-03-23	14.23.16 P2	19
39	2020-11-20	18.11.10	93.7		39	2021-02-23	12.57.24 P1	100		39	2021-01-15	16.20.44	119.1		39	2021-01-22	17.33.33	50		39	2021-03-02	14.56.24 P2	20		39	2021-03-31	10.55.52	33.6		39	2021-03-23	14.23.16 P3	10
40	2020-11-20	18.17.09	91.2		40	2021-02-23	12.57.24 P2	113.1		40	2021-01-15	16.31.40	105.7		40	2021-01-22	17.37.15	44.4		40	2021-03-02	14.58.08	22.3		40	2021-03-31	11.38.09	25.5		40	2021-03-23	14.23.16 P4	16
41	2020-11-20	18.20.56	89.6		41	2021-02-23	12.57.24 P3	116.1		41	2021-01-15	16.33.32	101.8		41	2021-01-22	17.40.56	37.1		41	2021-03-02	14.59.46	34.7		41	2021-03-31	11.39.49	30.7		41	2021-03-23	14.30.10	25.4
42	2020-11-20	18.20.56	98.1		42	2021-02-23	13.04.35	96		42	2021-01-15	16.35.41	116.6		42	2021-01-22	17.42.47 P1	33.4		42	2021-03-02	15.01.27	27.9		42	2021-03-31	11.41.01	34.1		42	2021-03-23	14.31.40	20.4
43	2020-11-20	18.20.56	96.2		43	2021-02-23	13.06.26 P1	106.1		43	2021-01-15	16.37.33	109		43	2021-01-22	17.42.47 P2	31.7		43	2021-03-02	15.03.05 P1	26.6		43	2021-03-31	11.42.36	24.2		43	2021-03-23	14.34.41	12.1
44	2020-11-20	18.22.51	97		44	2021-02-23	13.06.26 P2	103.2		44	2021-01-15	16.39.25	97.6		44	2021-01-22	17.53.58	36.4		44	2021-03-02	15.03.05 P2	25.7		44	2021-03-31	11.43.49 P1	38		44	2021-03-23	14.37.30	19.3
45	2020-11-20	18.24.43	97.1		45	2021-02-23	13.08.18	98.1		45	2021-01-15	16.46.26	119.7		45	2021-01-22	17.57.42	39.9		45	2021-03-02	15.03.05 P3	31.2		45	2021-03-31	11.43.49 P2	36.4
46	2020-11-20	18.24.43	101.6		46	2021-02-23	13.10.10	104.7		46	2021-01-15	16.51.59	99.3		46	2021-01-22	17.59.39	38.2		46	2021-03-02	15.04.34	29.1		46	2021-03-31	11.46.26	34.5
47	2020-11-20	18.26.35	111.4		47	2021-02-23	13.12.01	98.4		47	2021-01-15	16.58.19 P1	101.2		47	2021-01-22	18.03.22	43		47	2021-03-02	15.06.03	24.9		47	2021-03-31	11.48.18	42.2
48	2020-11-20	18.26.35	84.4		48	2021-02-23	13.13.52	98		48	2021-01-15	16.58.19 P2	104.2		48	2021-01-22	18.05.31	52.7		48	2021-03-02	15.07.44	20.5		48	2021-03-31	11.51.49	20.5
49	2020-11-20	18.26.35	107.1		49	2021-02-23	13.21.22	96.5							49	2021-01-22	18.09.15	35.9		49	2021-03-02	15.09.00	29.9		49	2021-03-31	11.55.46	43.3
50	2020-11-20	18.26.35	109.9		50	2021-02-23	13.23.13	111.8							50	2021-01-22	18.13.06	35.3		50	2021-03-02	15.10.29	26.9		50	2021-03-31	11.57.37	33.7
51	2020-11-06	10.15.26	91.6		51	2021-02-23	13.25.04	97.3							51	2021-01-22	18.16.58	44.1		51	2021-03-02	15.13.02	32.4		51	2021-03-31	11.59.24	32.1
52	2020-11-06	10.15.26	88.3		52	2021-02-23	13.28.47 P1	92.8							52	2021-01-22	18.11.07	30.7		52	2021-03-02	15.14.47	22.6		52	2021-03-31	12.02.44	29.9
53	2020-11-06	10.15.26	99.9		53	2021-02-23	13.28.47 P2	104.6												53	2021-03-02	15.16.15 P1	30.7		53	2021-03-31	12.04.02 P1	46.02
54	2020-11-06	10.35.21	94.6		54	2021-02-23	13.30.39 P1	98.7												54	2021-03-02	15.16.15 P2	33.7		54	2021-03-31	12.04.02 P2	34.7
55	2020-11-06	10.35.21	77.8		55	2021-02-23	13.30.39 P2	104.8												55	2021-03-02	15.18.05 P1	19.6		55	2021-03-31	12.07.10	32.3
56	2020-11-06	11.02.42	97.1		56	2021-02-23	13.32.3 P1	98.8												56	2021-03-02	15.18.05 P2	25.8		56	2021-03-31	12.08.43	34
57	2020-11-06	11.10.16	103.8		57	2021-02-23	13.32.3 P2	106.8												57	2021-03-02	15.18.05 P3	18.8		57	2021-03-31	12.11.08	30.8
58	2020-11-06	11.21.54	102.9		58	2021-02-23	13.34.22	107.6												58	2021-03-02	15.19.56	21.8		58	2021-03-31	12.12.24	40.5
59	2020-11-06	11.17.01	101.5		59	2021-02-23	13.36.14 P1	104.2
60	2020-11-06	11.26.00	91.2		60	2021-02-23	13.36.14 P2	94.4
61	2020-11-06	11.30.41	105		61	2021-02-23	13.38.06 P1	105.3
62	2020-11-06	11.33.07	95.6		62	2021-02-23	13.38.06 P2	100.6
63	2020-11-06	11.38.43	89.3		63	2021-02-23	13.38.06 P3	114.7
64	2020-11-06	11.41.10	87		64	2021-02-23	13.39.58	110.4
65	2020-11-06	11.42.37	90.1		65	2021-02-23	13.41.49	105.7
66	2020-11-06	11.43.37	74		66	2021-02-23	13.43.40	94.6
67	2020-11-06	11.46.14	96.2		67	2021-02-23	13.45.31	99.4
68	2020-11-06	11.52.24	86.1		68	2021-02-23	13.47.23	95.9
69	2020-11-06	11.54.59	96.8
70	2020-11-06	11.54.59	94.1
71	2020-11-06	12.00.02	94.4
72	2020-11-06	12.10.06	88.8
73	2020-11-06	12.10.06	86.6
74	2020-11-06	12.10.06	88.2
75	2020-11-06	12.10.06	111.9
76	2020-11-06	12.28.59	101.2
77	2020-11-06	12.31.24	100.5
78	2020-11-06	12.42.58	102.6
