# Supplementary material for: The effect of biomolecular corona on adsorption onto and desorption from a model lipid membrane
Source: Royal Society of Chemistry journal article supplement (doi:10.1039/d2nr05296b), 2022-12-06
Supplement: d2nr05296b2.xlsx [file d2nr05296b2.xlsx]

## Sheet: Blad1
Supplementary data
Track data for the interaction of 100 nm pristine particles interacting with lipid bilayers
experiment id	Track label	Start frame	Stop frame	y position (avg)	x position (avg)	Track duration (s)
2019-06-14_C4	Track_4620	10812	10814	147.891	127.886	0.1
2019-06-14_C4	Track_14450	10654	10656	350.321	71.601	0.1
2019-06-14_C4	Track_861	2374	2376	352.383	103.372	0.1
2019-06-14_C4	Track_341	1746	1748	228.887	107.065	0.1
2019-06-14_C4	Track_221	1131	1133	398.931	137.824	0.1
2019-06-14_C4	Track_36	464	466	270.146	189.844	0.1
2019-06-14_C4	Track_4100	9898	9901	58.69	114.283	0.15
2019-06-14_C4	Track_3675	5149	5152	259.867	153.182	0.15
2019-06-14_C4	Track_981	3384	3387	96.516	142.84	0.15
2019-06-14_C4	Track_969	3353	3356	97.629	143.654	0.15
2019-06-14_C4	Track_520	2069	2072	248.696	164.454	0.15
2019-06-14_C4	Track_4026	9783	9787	198.808	102.99	0.2
2019-06-14_C4	Track_523	2062	2066	251.178	161.445	0.2
2019-06-14_C4	Track_429	1751	1755	344.816	199.707	0.2
2019-06-14_C4	Track_15847	11208	11213	406.668	29.618	0.25
2019-06-14_C4	Track_2446	6913	6918	177.904	93.35	0.25
2019-06-14_C4	Track_2386	6772	6777	154.751	98.334	0.25
2019-06-14_C4	Track_1373	4337	4342	46.135	192.319	0.25
2019-06-14_C4	Track_1028	3505	3510	58.042	46.346	0.25
2019-06-14_C4	Track_12694	9825	9832	286.116	188.857	0.35
2019-06-14_C4	Track_30	452	461	268.047	184.771	0.45
2019-06-14_C4	Track_1038	3526	3536	205.083	202.434	0.5
2019-06-14_C4	Track_8800	7951	7962	410.475	76.641	0.55
2019-06-14_C4	Track_973	3359	3370	98.013	143.313	0.55
2019-06-14_C4	Track_231	1160	1172	331.912	79.708	0.6
2019-06-14_C4	Track_13049	9995	10008	425.547	63.412	0.65
2019-06-14_C4	Track_12836	9894	9907	368.208	35.804	0.65
2019-06-14_C4	many tracks	7216	7240	219.978	67.998	1.2
2019-06-14_C4	Track_2483	7006	7030	62.223	39.702	1.2
2019-06-14_C4	Track_851	3043	3067	111.131	213.646	1.2
2019-06-14_C4	Track_8865	7967	7994	410.389	77.158	1.35
2019-06-14_C4	Track_727	2212	2239	288.088	184.702	1.35
2019-06-14_C4	Track_1508	4635	4665	237.908	200.997	1.5
2019-06-14_C4	many tracks	6363	6400	400.024	4.25	1.85
2019-06-14_C4	Track_632	2371	2408	37.045	33.182	1.85
2019-06-14_C4	many tracks	6304	6344	399.103	4.587	2
2019-06-14_C4	Track_5835	6466	6508	386.265	214.279	2.1
2019-06-14_C4	many tracks	9058	9114	209.33	12.995	2.8
2019-06-14_C4	Track_1651	5039	5120	62.786	141.32	4.05
2019-06-14_C4	Track_649	2436	2522	59.723	36.637	4.3
2019-06-14_C4	Track_153	926	1018	258.978	111.257	4.6
2019-06-14_C4	Track_17	211	339	37.672	245.097	6.4
2019-06-14_C4	Track_566	2058	2198	231.78	57.599	7
2019-06-14_C4	Track_1487	3183	3536	344.276	71.256	17.65
2019-06-14_C4	many tracks	9161	9694	209.035	12.777	26.65
2019-06-14_C4	Track_39	409	1058	111.324	151.826	32.45
2019-06-14_C4	Track_3193	4756	5864	332.047	182.957	55.4
2019-06-14_C4	many tracks	367	1671	148.025	173.115	65.2
2019-06-14_C4	Track_34	386	2160	49.887	40.261	88.7
2019-06-14_C4	Track_3864	9521	11999	149.194	100.328	123.9
2019-06-14_C4	many tracks	9501	11999	475.134	91.514	124.9
2019-06-14_C4	many tracks	9490	11999	474.6	231.008	125.45
2019-06-14_C4	Track_3786	9390	11999	216.891	103.774	130.45
2019-06-14_C4	Track_11619	9321	11999	279.013	78.081	133.9
2019-06-14_C4	Track_11483	9241	11999	317.068	42.355	137.9
2019-06-14_C4	Track_3675	9202	11999	178.305	126.915	139.85
2019-06-14_C4	Track_3615	9122	11999	3.993	11.967	143.85
2019-06-14_C4	many tracks	9064	11999	413.95	204.734	146.75
2019-06-14_C4	Track_4821	8783	11999	171.964	119.991	160.8
2019-06-14_C4	Track_3420	8775	11999	174.581	20.041	161.2
2019-06-14_C4	Track_3386	8710	11999	195.052	91.315	164.45
2019-06-14_C4	Track_10386	8707	11999	402.075	162.478	164.6
2019-06-14_C4	many tracks	8537	11999	370.194	63.655	173.1
2019-06-14_C4	Track_9973	8509	11999	378.72	45.135	174.5
2019-06-14_C4	Track_4482	8479	11999	250.265	32.558	176
2019-06-14_C4	Track_3241	8438	11999	252.135	83.9	178.05
2019-06-14_C4	many tracks	8335	11999	309.751	42.417	183.2
2019-06-14_C4	Track_3173	8307	11999	242.049	201.014	184.6
2019-06-14_C4	many tracks	8246	11999	447.317	25.232	187.65
2019-06-14_C4	many tracks	8092	11999	47.757	151.91	195.35
2019-06-14_C4	many tracks	8016	11999	412.312	76.673	199.15
2019-06-14_C4	Track_2943	7928	11999	94.68	212.392	203.55
2019-06-14_C4	Track_8665	7884	11999	414.642	109.079	205.75
2019-06-14_C4	Track_2911	7872	11999	87.22	119.026	206.35
2019-06-14_C4	many tracks	7866	11999	172.86	25.092	206.65
2019-06-14_C4	Track_2896	7837	11999	44.132	117.804	208.1
2019-06-14_C4	Track_2841	7690	11999	232.977	127.128	215.45
2019-06-14_C4	many tracks	7620	11999	335.796	87.195	218.95
2019-06-14_C4	Track_2765	7537	11999	94.055	152.04	223.1
2019-06-14_C4	Track_2761	7530	11999	77.637	136.362	223.45
2019-06-14_C4	many tracks	7422	11999	437.508	198.001	228.85
2019-06-14_C4	many tracks	7413	11999	230.814	45.708	229.3
2019-06-14_C4	Track_2687	7401	11999	222.554	44.978	229.9
2019-06-14_C4	Track_2666	7360	11999	19.444	75.857	231.95
2019-06-14_C4	Track_2644	7319	11999	34.872	135.576	234
2019-06-14_C4	Track_2638	7304	11999	9.894	130.656	234.75
2019-06-14_C4	Track_2587	7217	11999	166.961	72.61	239.1
2019-06-14_C4	Track_7027	7099	11999	376.725	19.671	245
2019-06-14_C4	Track_2530	7094	11999	136.962	102.649	245.25
2019-06-14_C4	many tracks	7081	11999	333.745	42.198	245.9
2019-06-14_C4	Track_2518	7071	11999	185.204	204.292	246.4
2019-06-14_C4	many tracks	7061	11999	329.724	166.895	246.9
2019-06-14_C4	Track_2480	7002	11999	9.879	102.41	249.85
2019-06-14_C4	Track_2453	6928	11999	150.467	184.705	253.55
2019-06-14_C4	many tracks	6780	11999	441.698	158.904	260.95
2019-06-14_C4	many tracks	6638	11999	453.153	116.196	268.05
2019-06-14_C4	Track_6143	6619	11999	342.781	168.897	269
2019-06-14_C4	Track_2301	6580	11999	169.782	42.167	270.95
2019-06-14_C4	many tracks	6572	11999	422.161	159.399	271.35
2019-06-14_C4	Track_2287	6566	11999	35.622	60.362	271.65
2019-06-14_C4	Track_2275	6546	11999	0.051	126.999	272.65
2019-06-14_C4	many tracks	6512	11999	384.765	210.605	274.35
2019-06-14_C4	Track_2249	6485	11999	77.009	233.581	275.7
2019-06-14_C4	many tracks	6407	11999	401.041	5.763	279.6
2019-06-14_C4	many tracks	6373	11999	50	13	281.3
2019-06-14_C4	Track_2122	6190	11999	202.82	158.043	290.45
2019-06-14_C4	Track_5358	6189	11999	463.716	119.298	290.5
2019-06-14_C4	Track_2115	6176	11999	95.48	250.127	291.15
2019-06-14_C4	Track_5016	5994	11999	269.126	127.643	300.25
2019-06-14_C4	Track_1998	5929	11999	18.019	134.807	303.5
2019-06-14_C4	many tracks	5913	11999	135.86	32.081	304.3
2019-06-14_C4	Track_2296	5840	11999	139.001	245.854	307.95
2019-06-14_C4	Track_1959	5828	11999	195.542	134.844	308.55
2019-06-14_C4	many tracks	5802	11999	450.983	240.864	309.85
2019-06-14_C4	Track_4485	5682	11999	426.183	4.279	315.85
2019-06-14_C4	Track_4460	5676	11999	338.171	27.31	316.15
2019-06-14_C4	many tracks	5650	11999	383.646	233.56	317.45
2019-06-14_C4	Track_4364	5609	11999	310.874	236.197	319.5
2019-06-14_C4	Track_1854	5523	11999	31.513	20.976	323.8
2019-06-14_C4	many tracks	5501	11999	461.022	150.475	324.9
2019-06-14_C4	Track_4108	5455	11999	390.704	160.392	327.2
2019-06-14_C4	Track_1791	5362	11999	156.877	120.74	331.85
2019-06-14_C4	many tracks	5337	11999	505.562	49.668	333.1
2019-06-14_C4	many tracks	5281	11999	190.839	83.285	335.9
2019-06-14_C4	many tracks	5281	11999	372.077	237.41	335.9
2019-06-14_C4	Track_3857	5276	11999	260.521	157.078	336.15
2019-06-14_C4	Track_1727	5231	11999	246.668	100.025	338.4
2019-06-14_C4	Track_1703	5184	11999	44.532	155.843	340.75
2019-06-14_C4	many tracks	5170	11999	502.876	79.059	341.45
2019-06-14_C4	many tracks	5140	11999	296.95	223.672	342.95
2019-06-14_C4	many tracks	5079	11999	504.537	23.005	346
2019-06-14_C4	many tracks	5002	11999	370.141	57.396	349.85
2019-06-14_C4	many tracks	4993	11999	398.911	179.873	350.3
2019-06-14_C4	Track_3453	4976	11999	340.826	199.189	351.15
2019-06-14_C4	Track_3347	4881	11999	357.099	200.42	355.9
2019-06-14_C4	Track_3342	4878	11999	363.163	55.804	356.05
2019-06-14_C4	Track_1561	4765	11999	222.354	3.24	361.7
2019-06-14_C4	Track_1482	4589	11999	51.998	60.557	370.5
2019-06-14_C4	Track_1479	4578	11999	162.918	37.423	371.05
2019-06-14_C4	Track_1447	4507	11999	120.841	95.823	374.6
2019-06-14_C4	Track_2882	4494	11999	271.816	92.832	375.25
2019-06-14_C4	Track_1417	4427	11999	249.621	74.903	378.6
2019-06-14_C4	Track_1406	4402	11999	245.949	210.806	379.85
2019-06-14_C4	Track_2740	4386	11999	324.151	118.704	380.65
2019-06-14_C4	Track_1384	4360	11999	44.078	190.64	381.95
2019-06-14_C4	Track_1370	4330	11999	58.112	223.086	383.45
2019-06-14_C4	Track_1367	4326	11999	58.14	81.259	383.65
2019-06-14_C4	Track_1359	4297	11999	29.385	64.42	385.1
2019-06-14_C4	Track_2573	4242	11999	295.73	110.04	387.85
2019-06-14_C4	many tracks	4172	11999	502.758	33.617	391.35
2019-06-14_C4	many tracks	3863	11999	193.412	237.76	406.8
2019-06-14_C4	many tracks	3860	11999	426.687	98.123	406.95
2019-06-14_C4	Track_1956	3716	11999	339.978	122.401	414.15
2019-06-14_C4	Track_1104	3657	11999	131.995	113.648	417.1
2019-06-14_C4	many tracks	3640	11999	273.486	224.332	417.95
2019-06-14_C4	Track_1088	3632	11999	219.799	174.669	418.35
2019-06-14_C4	many tracks	3621	11999	137.662	236.208	418.9
2019-06-14_C4	Track_1064	3580	11999	152.147	118.975	420.95
2019-06-14_C4	many tracks	3573	11999	464.81	205.884	421.3
2019-06-14_C4	many tracks	3537	11999	205.763	201.84	423.1
2019-06-14_C4	many tracks	3499	11999	211.922	129.901	425
2019-06-14_C4	many tracks	3239	11999	447.001	168.053	438
2019-06-14_C4	many tracks	3211	11999	457.128	40.729	439.4
2019-06-14_C4	Track_1493	3194	11999	379.135	189.881	440.25
2019-06-14_C4	Track_1458	3149	11999	289.301	139.11	442.5
2019-06-14_C4	Track_1401	3087	11999	259.798	205.994	445.6
2019-06-14_C4	many tracks	3068	11999	86.115	136.638	446.55
2019-06-14_C4	many tracks	3058	11999	444.93	33.037	447.05
2019-06-14_C4	many tracks	3056	11999	31.156	48.912	447.15
2019-06-14_C4	many tracks	3010	11999	348.632	4.265	449.45
2019-06-14_C4	Track_828	2969	11999	179.052	186.732	451.5
2019-06-14_C4	many tracks	2950	11999	408.07	89.848	452.45
2019-06-14_C4	many tracks	2894	11999	428.502	115.964	455.25
2019-06-14_C4	Track_796	2890	11999	45.602	37.76	455.45
2019-06-14_C4	many tracks	2861	11999	103.41	130.307	456.9
2019-06-14_C4	Track_1226	2861	11999	285.165	109.192	456.9
2019-06-14_C4	Track_785	2855	11999	165.982	98.424	457.2
2019-06-14_C4	Track_769	2791	11999	76.766	152.737	460.4
2019-06-14_C4	many tracks	2756	11999	455.187	49.848	462.15
2019-06-14_C4	Track_752	2738	11999	66.927	155.511	463.05
2019-06-14_C4	Track_751	2722	11999	44.807	104.997	463.85
2019-06-14_C4	many tracks	2601	11999	472.566	76.055	469.9
2019-06-14_C4	Track_697	2555	11999	50.573	121.842	472.2
2019-06-14_C4	Track_690	2531	11999	65.417	35.038	473.4
2019-06-14_C4	Track_687	2528	11999	167.054	118.916	473.55
2019-06-14_C4	Track_928	2467	11999	445.764	53.542	476.6
2019-06-14_C4	many tracks	2463	11999	92.565	221.197	476.8
2019-06-14_C4	many tracks	2422	11999	206.492	153.338	478.85
2019-06-14_C4	Track_827	2332	11999	295.836	73.232	483.35
2019-06-14_C4	Track_598	2262	11999	30.128	217.434	486.85
2019-06-14_C4	Track_761	2248	11999	294.523	181.414	487.55
2019-06-14_C4	Track_580	2211	11999	53.37	252.721	489.4
2019-06-14_C4	many tracks	2209	11999	252.386	243.381	489.5
2019-06-14_C4	Track_691	2159	11999	370.329	48.316	492
2019-06-14_C4	Track_539	2105	11999	59.566	191.005	494.7
2019-06-14_C4	many tracks	2095	11999	261.228	163.67	495.2
2019-06-14_C4	many tracks	2092	11999	2.596	160.253	495.35
2019-06-14_C4	Track_527	2085	11999	234.636	110.816	495.7
2019-06-14_C4	many tracks	2031	11999	410.879	8.519	498.4
2019-06-14_C4	Track_1334	2026	11999	393.071	173.377	498.65
2019-06-14_C4	Track_462	1963	11999	14.94	80.705	501.8
2019-06-14_C4	many tracks	1939	11999	412.882	163.82	503
2019-06-14_C4	Track_442	1938	11999	131.889	211.932	503.05
2019-06-14_C4	Track_441	1934	11999	74.633	119.008	503.25
2019-06-14_C4	Track_444	1932	11999	184.15	193.393	503.35
2019-06-14_C4	many tracks	1925	11999	433.036	174.315	503.7
2019-06-14_C4	Track_430	1907	11999	95.717	239.822	504.6
2019-06-14_C4	Track_428	1904	11999	39.194	224.168	504.75
2019-06-14_C4	Track_515	1893	11999	375.676	55.646	505.3
2019-06-14_C4	many tracks	1853	11999	47.874	11.271	507.3
2019-06-14_C4	Track_399	1852	11999	114.46	138.686	507.35
2019-06-14_C4	Track_458	1804	11999	261.368	110.03	509.75
2019-06-14_C4	Track_361	1785	11999	168.43	10.922	510.7
2019-06-14_C4	many tracks	1776	11999	439.835	252.177	511.15
2019-06-14_C4	Track_331	1723	11999	161.239	91.66	513.8
2019-06-14_C4	many tracks	1618	11999	147.226	171.827	519.05
2019-06-14_C4	many tracks	1574	11999	496.701	65.358	521.25
2019-06-14_C4	many tracks	1557	11999	418.794	43.87	522.1
2019-06-14_C4	Track_267	1516	11999	25.367	9.45	524.15
2019-06-14_C4	Track_245	1461	11999	25.725	231.966	526.9
2019-06-14_C4	many tracks	1428	11999	344.947	53.842	528.55
2019-06-14_C4	many tracks	1386	11999	254.96	201.75	530.65
2019-06-14_C4	many tracks	1374	11999	205.048	153.489	531.25
2019-06-14_C4	Track_213	1369	11999	230.89	7.84	531.5
2019-06-14_C4	many tracks	1360	11999	213.879	253.6	531.95
2019-06-14_C4	many tracks	1298	11999	368.919	162.889	535.05
2019-06-14_C4	many tracks	1235	11999	124.963	248.963	538.2
2019-06-14_C4	many tracks	1235	11999	437.027	110.168	538.2
2019-06-14_C4	Track_250	1210	11999	297.889	40.716	539.45
2019-06-14_C4	Track_249	1209	11999	290.236	107.846	539.5
2019-06-14_C4	many tracks	1173	11999	430.583	151.289	541.3
2019-06-14_C4	Track_173	1154	11999	90.587	160.017	542.25
2019-06-14_C4	Track_171	1145	11999	28.721	75.871	542.7
2019-06-14_C4	many tracks	1115	11999	41.574	6.182	544.2
2019-06-14_C4	Track_204	1090	11999	276.529	120.253	545.45
2019-06-14_C4	Track_188	1041	11999	429.086	32.865	547.9
2019-06-14_C4	Track_132	980	11999	43.106	68.625	550.95
2019-06-14_C4	Track_123	925	11999	236.076	82.417	553.7
2019-06-14_C4	Track_131	871	11999	350.679	173.22	556.4
2019-06-14_C4	many tracks	840	11999	500.007	120.146	557.95
2019-06-14_C4	Track_122	836	11999	282.438	226.714	558.15
2019-06-14_C4	Track_121	836	11999	351.62	149.065	558.15
2019-06-14_C4	Track_120	834	11999	332.974	161.603	558.25
2019-06-14_C4	Track_87	780	11999	57.383	94.845	560.95
2019-06-14_C4	many tracks	738	11999	40.496	136.144	563.05
2019-06-14_C4	Track_80	731	11999	22.763	27.322	563.4
2019-06-14_C4	many tracks	707	11999	425.515	85.953	564.6
2019-06-14_C4	Track_74	693	11999	239.978	146.166	565.3
2019-06-14_C4	many tracks	684	11999	52.544	210.021	565.75
2019-06-14_C4	Track_69	684	11999	230.381	250.461	565.75
2019-06-14_C4	Track_65	677	11999	94.875	245.563	566.1
2019-06-14_C4	many tracks	610	11999	230.451	32.911	569.45
2019-06-14_C4	Track_68	609	11999	329.98	248.374	569.5
2019-06-14_C4	Track_53	583	11999	52.465	236.706	570.8
2019-06-14_C4	Track_50	531	11999	56.005	4.281	573.4
2019-06-14_C4	Track_49	517	11999	95.018	185.952	574.1
2019-06-14_C4	many tracks	477	11999	296.317	188.258	576.1
2019-06-14_C4	many tracks	412	11999	420.106	139.134	579.35
2019-06-14_C4	many tracks	401	11999	396.267	213.937	579.9
2019-06-14_C4	many trakcs	385	11999	491.885	92.27	580.7
2019-06-14_C4	many tracks	363	11999	50.541	242.18	581.8
2019-06-14_C4	many tracks	327	11999	257.753	252.576	583.6
2019-06-14_C4	many tracks	239	11999	394.54	234.266	588
2019-06-14_C4	many tracks	229	11999	338.848	84.781	588.5
2019-06-14_C4	Track_1	99	11999	138.76	82.324	595
2019-06-14_C4	many tracks	58	11999	422.545	28.895	597.05
2019-06-14_C4	Track_0	0	11999	58.869	149.456	599.95
2019-06-14_C4	Track_0	0	11999	366.055	169.497	599.95
2019-06-18_C1	Track_15420	11222	11224	372.181	190.156	0.1
2019-06-18_C1	Track_2006	6279	6281	130.324	222.032	0.1
2019-06-18_C1	Track_671	3690	3692	115.234	197.509	0.1
2019-06-18_C1	Track_212	2286	2288	190.713	2.349	0.1
2019-06-18_C1	Track_120	1567	1569	105.505	167.962	0.1
2019-06-18_C1	Track_346	1285	1287	265.609	26.913	0.1
2019-06-18_C1	Track_213	977	979	435.005	224.896	0.1
2019-06-18_C1	Track_30	595	597	126.29	74.225	0.1
2019-06-18_C1	Track_626	3584	3587	125.9	152.261	0.15
2019-06-18_C1	Track_7906	7424	7428	263.204	6.569	0.2
2019-06-18_C1	Track_288	2595	2599	101.952	184.801	0.2
2019-06-18_C1	Track_756	3910	3915	224.873	168.83	0.25
2019-06-18_C1	Track_728	3843	3848	191.077	75.739	0.25
2019-06-18_C1	Track_40	823	828	100.142	69.585	0.25
2019-06-18_C1	Track_1736	5822	5830	67.019	179.415	0.4
2019-06-18_C1	Track_588	1909	1918	341.086	233.438	0.45
2019-06-18_C1	Track_204	962	973	442.324	229.889	0.55
2019-06-18_C1	Track_5206	11491	11506	85.966	66.14	0.75
2019-06-18_C1	Track_215	988	1003	481.459	145.396	0.75
2019-06-18_C1	many tracks	10051	10067	431.223	128.79	0.8
2019-06-18_C1	Track_595	3507	3525	40.871	84.808	0.9
2019-06-18_C1	Track_789	3992	4011	35.469	35.9	0.95
2019-06-18_C1	Track_207	2263	2284	232.974	250.442	1.05
2019-06-18_C1	Track_3571	4668	4693	260.868	80.33	1.25
2019-06-18_C1	Track_2574	3945	3971	414.407	209.57	1.3
2019-06-18_C1	Track_920	2419	2447	436.894	4.074	1.4
2019-06-18_C1	Track_612	3542	3575	38.497	87.333	1.65
2019-06-18_C1	Track_7916	7430	7464	264.922	8.557	1.7
2019-06-18_C1	Track_5479	11857	11897	135.193	89.001	2
2019-06-18_C1	Track_3981	9739	9852	172.048	147.06	5.65
2019-06-18_C1	Track_266	1107	1230	401.342	35.705	6.15
2019-06-18_C1	Track_3859	9541	11999	216.355	222.535	122.9
2019-06-18_C1	Track_3814	9464	11999	234.49	33.168	126.75
2019-06-18_C1	Track_11564	9339	11999	326.215	175.365	133
2019-06-18_C1	many tracks	9332	11999	488.087	60.484	133.35
2019-06-18_C1	Track_11236	9233	11999	442	202.956	138.3
2019-06-18_C1	many tracks	8919	11999	92.149	253.217	154
2019-06-18_C1	Track_3429	8749	11999	234.123	215.201	162.5
2019-06-18_C1	Track_3411	8720	11999	113.979	82.793	163.95
2019-06-18_C1	Track_3275	8486	11999	84.541	129.884	175.65
2019-06-18_C1	Track_9716	8414	11999	447.867	123.322	179.25
2019-06-18_C1	many tracks	8324	11999	414.534	215.567	183.75
2019-06-18_C1	Track_9424	8256	11999	370.986	42.747	187.15
2019-06-18_C1	many tracks	8228	11999	77.765	204.038	188.55
2019-06-18_C1	many tracks	8225	11999	283.708	141.247	188.7
2019-06-18_C1	many tracks	8197	11999	28.4	138.089	190.1
2019-06-18_C1	Track_9172	8125	11999	341.617	112.121	193.7
2019-06-18_C1	many tracks	7922	11999	346.419	46.484	203.85
2019-06-18_C1	many tracks	7757	11999	439.216	19.24	212.1
2019-06-18_C1	many tracks	7716	11999	247.578	144.421	214.15
2019-06-18_C1	many tracks	7463	11999	152.203	182.714	226.8
2019-06-18_C1	many tracks	7393	11999	211.215	212.467	230.3
2019-06-18_C1	Track_2611	7351	11999	217.738	145.659	232.4
2019-06-18_C1	many tracks	7338	11999	424.037	21.578	233.05
2019-06-18_C1	Track_7704	7310	11999	457.031	65.931	234.45
2019-06-18_C1	many tracks	7182	11999	131.263	41.548	240.85
2019-06-18_C1	Track_2486	7156	11999	180.941	51.982	242.15
2019-06-18_C1	Track_7206	7019	11999	387.532	168.494	249
2019-06-18_C1	many tracks	6692	11683	305.007	8.07	249.55
2019-06-18_C1	many tracks	6944	11999	337.35	104.36	252.75
2019-06-18_C1	Track_2356	6898	11999	212.74	250.909	255.05
2019-06-18_C1	many tracks	6696	11999	99.975	103.474	265.15
2019-06-18_C1	many tracks	6649	11999	36.653	133.321	267.5
2019-06-18_C1	Track_2203	6624	11999	12.93	59.143	268.75
2019-06-18_C1	Track_2146	6523	11999	105.976	62.796	273.8
2019-06-18_C1	Track_2112	6460	11999	149.457	244.708	276.95
2019-06-18_C1	Track_2078	6404	11999	195.748	167.928	279.75
2019-06-18_C1	many tracks	6345	11999	421.443	167.553	282.7
2019-06-18_C1	Track_2033	6332	11999	78.74	234.619	283.35
2019-06-18_C1	Track_2021	6317	11999	161.05	140.913	284.1
2019-06-18_C1	many tracks	6303	11999	46.726	191.944	284.8
2019-06-18_C1	many tracks	6219	11999	442.763	237.692	289
2019-06-18_C1	many tracks	6168	11999	346.189	249.82	291.55
2019-06-18_C1	Track_5248	5852	11999	491.743	114.036	307.35
2019-06-18_C1	Track_1750	5849	11999	76.066	185.806	307.5
2019-06-18_C1	Track_1696	5766	11999	23.355	23.042	311.65
2019-06-18_C1	Track_1679	5736	11999	177.973	35.668	313.15
2019-06-18_C1	many tracks	5694	11999	485.854	162.152	315.25
2019-06-18_C1	many tracks	5537	11999	109.497	181.386	323.1
2019-06-18_C1	many tracks	5338	11999	490.263	44.069	333.05
2019-06-18_C1	Track_1458	5334	11999	58.975	203.961	333.25
2019-06-18_C1	Track_1435	5304	11999	140.416	148.976	334.75
2019-06-18_C1	Track_1404	5243	11999	204.494	116.017	337.8
2019-06-18_C1	Track_1374	5200	11999	123.367	200.561	339.95
2019-06-18_C1	Track_4242	5148	11999	353.226	209.244	342.55
2019-06-18_C1	Track_4232	5143	11999	336.624	60.968	342.8
2019-06-18_C1	Track_1329	5116	11999	52	204.435	344.15
2019-06-18_C1	Track_1260	4973	11999	158.138	95.968	351.3
2019-06-18_C1	many tracks	4827	11999	484.067	171.917	358.6
2019-06-18_C1	Track_1178	4823	11999	55.656	174.679	358.8
2019-06-18_C1	Track_3713	4768	11999	290.647	204.913	361.55
2019-06-18_C1	Track_1139	4751	11999	212.067	181.349	362.4
2019-06-18_C1	Track_1136	4749	11999	50.988	170.21	362.5
2019-06-18_C1	many tracks	4748	11999	18.534	246.931	362.55
2019-06-18_C1	Track_3385	4526	11999	405.86	40.694	373.65
2019-06-18_C1	Track_991	4460	11999	224.418	80.113	376.95
2019-06-18_C1	many tracks	4391	11999	409.565	221.501	380.4
2019-06-18_C1	Track_949	4378	11999	21.092	35.239	381.05
2019-06-18_C1	Track_931	4342	11999	214.796	140.987	382.85
2019-06-18_C1	Track_892	4238	11999	205.066	95.135	388.05
2019-06-18_C1	many tracks	4191	11999	277.222	101.574	390.4
2019-06-18_C1	Track_2887	4170	11999	288.004	93.828	391.45
2019-06-18_C1	many tracks	4149	11999	51.431	71.543	392.5
2019-06-18_C1	many tracks	4146	11999	482.283	15.767	392.65
2019-06-18_C1	Track_2748	4069	11999	280.921	73.307	396.5
2019-06-18_C1	many tracks	4047	11999	97.782	214.922	397.6
2019-06-18_C1	many tracks	3976	11999	412.866	207.928	401.15
2019-06-18_C1	Track_2276	3756	11999	310.806	62.002	412.15
2019-06-18_C1	many tracks	3747	11999	377.213	126.932	412.6
2019-06-18_C1	many tracks	3746	11999	393.629	18.935	412.65
2019-06-18_C1	Track_685	3740	11999	186.976	186.724	412.95
2019-06-18_C1	Track_2230	3728	11999	364.036	236.824	413.55
2019-06-18_C1	many tracks	3697	11999	9.173	21.068	415.1
2019-06-18_C1	Track_667	3694	11999	116.939	194.974	415.25
2019-06-18_C1	Track_2127	3650	11999	355.444	160.348	417.45
2019-06-18_C1	Track_641	3616	11999	116.98	107.212	419.15
2019-06-18_C1	many tracks	3575	11999	117.312	214.109	421.2
2019-06-18_C1	many tracks	3518	11999	340.759	36.243	424.05
2019-06-18_C1	many tracks	3506	11999	328.369	198.909	424.65
2019-06-18_C1	many tracks	3472	11999	33.584	248.242	426.35
2019-06-18_C1	many tracks	3471	11999	33.628	248.293	426.4
2019-06-18_C1	Track_1880	3417	11999	265.427	137.04	429.1
2019-06-18_C1	many tracks	3413	11999	184.986	213.581	429.3
2019-06-18_C1	Track_557	3394	11999	203.143	124.936	430.25
2019-06-18_C1	many tracks	3339	11999	38.263	43.291	433
2019-06-18_C1	Track_1672	3245	11999	403.786	144.175	437.7
2019-06-18_C1	many tracks	3218	11999	397.653	210.942	439.05
2019-06-18_C1	Track_1641	3216	11999	352.786	183.516	439.15
2019-06-18_C1	many tracks	3201	11999	22.484	197.169	439.9
2019-06-18_C1	Track_1367	2930	11999	396.01	75.628	453.45
2019-06-18_C1	many tracks	2928	11999	336.446	45.399	453.55
2019-06-18_C1	many tracks	2901	11999	2.433	243.791	454.9
2019-06-18_C1	Track_340	2895	11999	176.716	138.216	455.2
2019-06-18_C1	Track_336	2892	11999	128.976	216.574	455.35
2019-06-18_C1	many tracks	2888	11999	367.492	91.971	455.55
2019-06-18_C1	Track_1298	2874	11999	333.08	190.688	456.25
2019-06-18_C1	many tracks	2870	11999	309.138	221.828	456.45
2019-06-18_C1	Track_1295	2867	11999	277.122	117.228	456.6
2019-06-18_C1	Track_331	2854	11999	66.41	162.07	457.25
2019-06-18_C1	Track_320	2793	11999	106.413	197.011	460.3
2019-06-18_C1	Track_1170	2726	11999	371.461	148.067	463.65
2019-06-18_C1	many tracks	2720	11999	468.867	29.854	463.95
2019-06-18_C1	Track_1144	2709	11999	379.182	71.717	464.5
2019-06-18_C1	many tracks	2634	11999	5.56	213.368	468.25
2019-06-18_C1	Track_1087	2616	11999	367.128	208.316	469.15
2019-06-18_C1	many tracks	2604	11999	124.978	227.473	469.75
2019-06-18_C1	Track_1045	2584	11999	327.222	110.248	470.75
2019-06-18_C1	many tracks	2574	11999	472.211	194.308	471.25
2019-06-18_C1	many tracks	2547	11999	226.865	197.001	472.6
2019-06-18_C1	many tracks	2544	11999	238.248	220.35	472.75
2019-06-18_C1	many tracks	2457	11999	210.669	7.065	477.1
2019-06-18_C1	Track_232	2420	11999	209.148	114.319	478.95
2019-06-18_C1	Track_230	2414	11999	153.196	78.105	479.25
2019-06-18_C1	Track_228	2408	11999	95.965	237.027	479.55
2019-06-18_C1	Track_896	2404	11999	324.35	161.789	479.75
2019-06-18_C1	Track_855	2358	11999	455.869	131.776	482.05
2019-06-18_C1	Track_214	2307	11999	92.479	165.019	484.6
2019-06-18_C1	Track_215	2307	11999	144.566	83.035	484.6
2019-06-18_C1	many tracks	2236	11999	355.274	244.831	488.15
2019-06-18_C1	many tracks	2224	11999	410.572	218.495	488.75
2019-06-18_C1	Track_193	2156	11999	106.45	160.888	492.15
2019-06-18_C1	Track_186	2120	11999	194.045	160.223	493.95
2019-06-18_C1	many tracks	2114	11999	79.646	14.964	494.25
2019-06-18_C1	Track_181	2080	11999	131.945	29.559	495.95
2019-06-18_C1	Track_665	2060	11999	270.886	97.269	496.95
2019-06-18_C1	Track_177	2052	11999	82.358	78.97	497.35
2019-06-18_C1	Track_174	2027	11999	19.035	189.033	498.6
2019-06-18_C1	Track_172	2015	11999	217.307	87.015	499.2
2019-06-18_C1	Track_173	1992	11999	14.145	233.036	500.35
2019-06-18_C1	many tracks	1968	11999	351.418	245.213	501.55
2019-06-18_C1	Track_163	1964	11999	193.602	242.892	501.75
2019-06-18_C1	many tracks	1926	11999	209.557	146.375	503.65
2019-06-18_C1	many tracks	1885	11999	344.577	196.761	505.7
2019-06-18_C1	Track_580	1878	11999	406.911	21.496	506.05
2019-06-18_C1	many tracks	1788	11999	121.665	79.838	510.55
2019-06-18_C1	Track_498	1676	11999	383.243	36.814	516.15
2019-06-18_C1	many tracks	1631	11999	140.386	230.623	518.4
2019-06-18_C1	many tracks	1593	11999	106.82	250.461	520.3
2019-06-18_C1	Track_123	1584	11999	98.85	145.963	520.75
2019-06-18_C1	many tracks	1508	11999	490.15	219.935	524.55
2019-06-18_C1	many tracks	1506	11999	39.709	50.053	524.65
2019-06-18_C1	Track_111	1465	11999	124.443	55.105	526.7
2019-06-18_C1	Track_411	1463	11999	406.996	107.164	526.8
2019-06-18_C1	many tracks	1459	11999	432.601	136.373	527
2019-06-18_C1	Track_407	1449	11999	466.972	58.352	527.5
2019-06-18_C1	many tracks	1439	11999	229.617	196.576	528
2019-06-18_C1	Track_107	1429	11999	119.89	62.922	528.5
2019-06-18_C1	many tracks	1386	11999	7.562	241.176	530.65
2019-06-18_C1	many tracks	1324	11999	68.886	7.942	533.75
2019-06-18_C1	Track_98	1307	11999	19.315	169.098	534.6
2019-06-18_C1	Track_348	1291	11999	266.161	33.367	535.4
2019-06-18_C1	many tracks	1271	11999	294.871	94.884	536.4
2019-06-18_C1	many tracks	1244	11999	313.679	224.304	537.75
2019-06-18_C1	Track_313	1226	11999	366.162	71.749	538.65
2019-06-18_C1	Track_88	1215	11999	108.344	41.87	539.2
2019-06-18_C1	many tracks	1182	11999	489.206	195.014	540.85
2019-06-18_C1	Track_81	1158	11999	117.844	225.301	542.05
2019-06-18_C1	Track_79	1145	11999	120.728	68.273	542.7
2019-06-18_C1	many tracks	1100	11999	120.76	231.786	544.95
2019-06-18_C1	many tracks	1099	11999	501.522	167.36	545
2019-06-18_C1	Track_74	1094	11999	57.286	139.543	545.25
2019-06-18_C1	Track_71	1071	11999	140.169	249.671	546.4
2019-06-18_C1	Track_70	1066	11999	231.412	202.01	546.65
2019-06-18_C1	Track_69	1052	11999	8.949	124.809	547.35
2019-06-18_C1	Track_66	1031	11999	219.733	189.969	548.4
2019-06-18_C1	Track_232	1016	11999	330.767	207.872	549.15
2019-06-18_C1	many tracks	984	11999	408.043	137.872	550.75
2019-06-18_C1	many tracks	962	11999	54.1	98.169	551.85
2019-06-18_C1	many tracks	947	11999	342.916	246.143	552.6
2019-06-18_C1	many tracks	932	11999	49.086	81.221	553.35
2019-06-18_C1	Track_56	924	11999	185.929	40.658	553.75
2019-06-18_C1	Track_195	922	11999	265.222	252.211	553.85
2019-06-18_C1	many tracks	917	11999	51.27	117.403	554.1
2019-06-18_C1	Track_55	917	11999	113.789	56.404	554.1
2019-06-18_C1	Track_53	909	11999	243.843	200.302	554.5
2019-06-18_C1	many tracks	904	11999	244.05	164.318	554.75
2019-06-18_C1	Track_185	896	11999	287.976	233.546	555.15
2019-06-18_C1	Track_44	890	11999	176.092	44.875	555.45
2019-06-18_C1	many tracks	880	11999	263.427	62.1	555.95
2019-06-18_C1	many tracks	870	11999	328.462	20.267	556.45
2019-06-18_C1	many tracks	818	11999	399.104	226.072	559.05
2019-06-18_C1	many tracks	802	11999	343.753	50.882	559.85
2019-06-18_C1	many tracks	787	11999	430.321	124.271	560.6
2019-06-18_C1	Track_37	780	11999	124.847	171.269	560.95
2019-06-18_C1	Track_2936	759	11999	190.923	252.65	562
2019-06-18_C1	Track_34	739	11999	137.122	81.646	563
2019-06-18_C1	many tracks	706	11999	242.171	77.829	564.65
2019-06-18_C1	many tracks	695	11999	456.524	25.497	565.2
2019-06-18_C1	many tracks	611	11999	330.906	135.481	569.4
2019-06-18_C1	many tracks	605	11999	127.318	78.454	569.7
2019-06-18_C1	Track_106	601	11999	328.099	47.39	569.9
2019-06-18_C1	Track_28	588	11999	46.023	28.694	570.55
2019-06-18_C1	Track_29	584	11999	61.943	195.474	570.75
2019-06-18_C1	many tracks	562	11999	337.167	132.36	571.85
2019-06-18_C1	Track_27	544	11999	217.481	114.03	572.75
2019-06-18_C1	Track_93	533	11999	341.897	134.651	573.3
2019-06-18_C1	Track_142	508	11999	441.278	74.974	574.55
2019-06-18_C1	many tracks	482	11999	508.291	105.503	575.85
2019-06-18_C1	many tracks	476	11999	486.925	82.919	576.15
2019-06-18_C1	many tracks	452	11999	429.837	164.264	577.35
2019-06-18_C1	Track_26	450	11999	236.599	150.689	577.45
2019-06-18_C1	Track_25	441	11999	177.153	68.902	577.9
2019-06-18_C1	Track_24	430	11999	14.401	112.566	578.45
2019-06-18_C1	many tracks	413	11999	2.562	143.579	579.3
2019-06-18_C1	Track_21	377	11999	158.673	244.435	581.1
2019-06-18_C1	Track_22	376	11999	229.72	132.112	581.15
2019-06-18_C1	Track_20	352	11999	239.939	127.164	582.35
2019-06-18_C1	Track_19	327	11999	225.227	245.928	583.6
2019-06-18_C1	Track_18	314	11999	152.023	251.994	584.25
2019-06-18_C1	many tracks	312	11999	298.412	54.203	584.35
2019-06-18_C1	Track_17	307	11999	172.478	80.132	584.6
2019-06-18_C1	many tracks	305	11999	457.671	197.509	584.7
2019-06-18_C1	Track_16	271	11999	14.282	44.299	586.4
2019-06-18_C1	Track_43	259	11999	341.026	12.545	587
2019-06-18_C1	many tracks	188	11999	500.57	142.155	590.55
2019-06-18_C1	many tracks	187	11999	367.5	50.148	590.6
2019-06-18_C1	Track_12	186	11999	187.764	166.821	590.65
2019-06-18_C1	Track_27	181	11999	382.847	211.529	590.9
2019-06-18_C1	many tracks	178	11999	28.213	131.153	591.05
2019-06-18_C1	Track_25	156	11999	371.835	161.373	592.15
2019-06-18_C1	many tracks	139	11999	419.751	47.811	593
2019-06-18_C1	Track_9	92	11999	370.916	232.604	595.35
2019-06-18_C1	many tracks	76	11999	216.418	4.116	596.15
2019-06-18_C1	many tracks	54	11999	204.21	108.287	597.25
2019-06-18_C1	Track_7	47	11999	187.729	178.114	597.6
2019-06-18_C1	many tracks	45	11999	178.903	130.518	597.7
2019-06-18_C1	many tracks	39	11999	396.605	16.716	598
2019-06-18_C1	Track_7	25	11999	379.091	44.958	598.7
2019-06-18_C1	Track_2	0	11999	344.764	245.091	599.95
2019-06-18_C1	many tracks	0	11999	49.911	189.034	599.95
2019-06-18_C1	many tracks	0	11999	65.519	70.464	599.95
2019-06-18_C1	many tracks	0	11999	212.969	7.781	599.95
2019-06-18_C1	Track_4	0	11999	235.018	195.467	599.95
2019-06-18_C1	Track_5	0	11999	240.128	39.8	599.95
2019-06-18_C1	Track_0	0	11999	270.918	14.148	599.95
2019-06-18_C1	many tracks	0	11999	316.479	34.456	599.95
2019-06-18_C1	many tracks	0	11999	343.064	245.882	599.95
2019-06-28_C2	Track_8902	11362	11364	278.031	159.044	0.1
2019-06-28_C2	Track_8798	11308	11310	9.478	23.75	0.1
2019-06-28_C2	Track_8794	11305	11307	8.79	22.252	0.1
2019-06-28_C2	Track_8780	11297	11299	9.079	24.512	0.1
2019-06-28_C2	Track_7828	10706	10708	6.385	23.963	0.1
2019-06-28_C2	Track_7492	10496	10498	300.142	176.825	0.1
2019-06-28_C2	Track_5367	9148	9150	341.641	2.418	0.1
2019-06-28_C2	Track_5255	9079	9081	50.508	57.557	0.1
2019-06-28_C2	Track_4657	8675	8677	147.046	110.001	0.1
2019-06-28_C2	Track_4210	8333	8335	331.655	72.765	0.1
2019-06-28_C2	Track_3995	8154	8156	323.166	204.415	0.1
2019-06-28_C2	Track_3954	8124	8126	78.328	96.617	0.1
2019-06-28_C2	Track_3905	8077	8079	224.446	159.43	0.1
2019-06-28_C2	Track_3278	7506	7508	267.165	179.314	0.1
2019-06-28_C2	Track_3013	7211	7213	184.581	146.581	0.1
2019-06-28_C2	Track_2855	7019	7021	283.651	139.665	0.1
2019-06-28_C2	Track_2672	6807	6809	23.02	30.733	0.1
2019-06-28_C2	Track_2170	6189	6191	13.166	106.024	0.1
2019-06-28_C2	Track_2146	6163	6165	4.294	95.787	0.1
2019-06-28_C2	Track_1666	5463	5465	104.81	124.309	0.1
2019-06-28_C2	Track_1600	5382	5384	121.13	106.858	0.1
2019-06-28_C2	Track_1552	5336	5338	120.78	106.639	0.1
2019-06-28_C2	Track_1483	5225	5227	144.503	56.966	0.1
2019-06-28_C2	Track_1146	4704	4706	240.95	152.746	0.1
2019-06-28_C2	Track_1135	4700	4702	124.473	64.269	0.1
2019-06-28_C2	Track_727	3947	3949	238.943	4.222	0.1
2019-06-28_C2	Track_581	3578	3580	36.87	217.611	0.1
2019-06-28_C2	Track_535	3464	3466	74.697	133.638	0.1
2019-06-28_C2	Track_418	3074	3076	246.982	205.945	0.1
2019-06-28_C2	Track_306	2637	2639	164.142	142.522	0.1
2019-06-28_C2	Track_291	2612	2614	7.173	95.355	0.1
2019-06-28_C2	Track_271	2572	2574	164.704	144.021	0.1
2019-06-28_C2	Track_257	2541	2543	163.799	142.537	0.1
2019-06-28_C2	Track_241	2482	2484	164.674	144.326	0.1
2019-06-28_C2	Track_240	2462	2464	163.694	142.092	0.1
2019-06-28_C2	Track_232	2445	2447	164.698	143.478	0.1
2019-06-28_C2	Track_197	2385	2387	164.987	143.934	0.1
2019-06-28_C2	Track_149	2202	2204	163.925	142.184	0.1
2019-06-28_C2	Track_100	1961	1963	291.581	246.475	0.1
2019-06-28_C2	Track_80	1681	1683	342.367	137.51	0.1
2019-06-28_C2	Track_53	1024	1026	53.974	36.587	0.1
2019-06-28_C2	Track_11	313	315	54.557	205.959	0.1
2019-06-28_C2	Track_9405	11663	11666	312.888	130.735	0.15
2019-06-28_C2	Track_8918	11372	11375	278.699	167.868	0.15
2019-06-28_C2	Track_8784	11301	11304	9.65	23.585	0.15
2019-06-28_C2	Track_7754	10658	10661	9.519	23.598	0.15
2019-06-28_C2	Track_7602	10562	10565	9.325	22.776	0.15
2019-06-28_C2	Track_7133	10263	10266	202.419	200.215	0.15
2019-06-28_C2	Track_7103	10236	10239	6.582	24.271	0.15
2019-06-28_C2	Track_4058	8209	8212	76.345	96.895	0.15
2019-06-28_C2	Track_2396	6471	6474	81.298	102.563	0.15
2019-06-28_C2	Track_2174	6198	6201	16.79	99.412	0.15
2019-06-28_C2	Track_1211	4817	4820	187.134	173.021	0.15
2019-06-28_C2	Track_959	4398	4401	102.378	95.691	0.15
2019-06-28_C2	Track_754	3994	3997	217.05	120.082	0.15
2019-06-28_C2	Track_751	3986	3989	235.882	0.618	0.15
2019-06-28_C2	Track_300	2619	2622	164.626	144.376	0.15
2019-06-28_C2	Track_189	2363	2366	163.789	142.607	0.15
2019-06-28_C2	Track_144	2181	2184	164.66	144.09	0.15
2019-06-28_C2	Track_8929	11377	11381	276.177	168.21	0.2
2019-06-28_C2	Track_8184	10930	10934	9.112	22.529	0.2
2019-06-28_C2	Track_7768	10664	10668	293.537	182.596	0.2
2019-06-28_C2	Track_7524	10519	10523	294.118	176.53	0.2
2019-06-28_C2	Track_6463	9838	9842	105.132	204.007	0.2
2019-06-28_C2	Track_4128	8262	8266	75.48	98.18	0.2
2019-06-28_C2	Track_4068	8218	8222	76.201	97.966	0.2
2019-06-28_C2	Track_3927	8098	8102	78.179	97.75	0.2
2019-06-28_C2	Track_1584	5375	5379	120.978	106.469	0.2
2019-06-28_C2	Track_1539	5329	5333	120.878	106.588	0.2
2019-06-28_C2	Track_14	462	466	255.932	167.008	0.2
2019-06-28_C2	Track_7559	10536	10541	297.397	177.432	0.25
2019-06-28_C2	Track_6669	9969	9974	6.71	22.583	0.25
2019-06-28_C2	Track_1602	5392	5397	121.077	106.477	0.25
2019-06-28_C2	Track_1306	4980	4985	305.125	117.915	0.25
2019-06-28_C2	Track_206	2395	2400	57.303	97.068	0.25
2019-06-28_C2	Track_2	43	48	109.716	208.737	0.25
2019-06-28_C2	Track_7573	10544	10550	9.295	22.523	0.3
2019-06-28_C2	Track_4092	8239	8245	76.157	98.211	0.3
2019-06-28_C2	Track_4075	8223	8229	76.445	97.942	0.3
2019-06-28_C2	Track_3903	8076	8082	78.033	97.336	0.3
2019-06-28_C2	Track_1517	5287	5293	454.383	109.101	0.3
2019-06-28_C2	Track_200	2388	2394	164.349	144.467	0.3
2019-06-28_C2	Track_168	2300	2306	164.746	144.386	0.3
2019-06-28_C2	Track_103	1979	1985	152.599	250.164	0.3
2019-06-28_C2	Track_4198	8325	8332	78.549	100.682	0.35
2019-06-28_C2	Track_4083	8230	8238	75.793	98.268	0.4
2019-06-28_C2	Track_1507	5274	5282	120.67	106.525	0.4
2019-06-28_C2	Track_145	2188	2196	164.894	144.12	0.4
2019-06-28_C2	Track_64	1305	1313	64.159	32.43	0.4
2019-06-28_C2	Track_6522	9875	9884	270.433	218.236	0.45
2019-06-28_C2	Track_3944	8113	8122	78.362	97.201	0.45
2019-06-28_C2	Track_3934	8103	8112	78.26	97.977	0.45
2019-06-28_C2	Track_1041	4538	4547	135.91	95.167	0.45
2019-06-28_C2	Track_986	4442	4451	340.724	101.724	0.45
2019-06-28_C2	Track_160	2257	2266	138.746	239.936	0.45
2019-06-28_C2	Track_4173	8301	8311	75.6	98.006	0.5
2019-06-28_C2	Track_3909	8083	8093	77.933	97.88	0.5
2019-06-28_C2	many tracks	5387	5397	256.149	124.701	0.5
2019-06-28_C2	Track_652	3744	3754	30.49	230.959	0.5
2019-06-28_C2	Track_33	706	716	32.582	253.182	0.5
2019-06-28_C2	Track_8196	10937	10948	8.708	22.403	0.55
2019-06-28_C2	Track_4107	8250	8261	76.453	97.933	0.55
2019-06-28_C2	Track_4017	8176	8187	78.019	97.342	0.55
2019-06-28_C2	Track_1549	5341	5352	120.895	106.587	0.55
2019-06-28_C2	Track_4249	8357	8369	85.985	28.082	0.6
2019-06-28_C2	Track_3420	7643	7655	268.888	245.687	0.6
2019-06-28_C2	Track_153	2222	2234	161.868	173.102	0.6
2019-06-28_C2	Track_3852	8035	8049	79.299	96.8	0.7
2019-06-28_C2	Track_1563	5353	5368	120.86	106.475	0.75
2019-06-28_C2	Track_1607	5398	5414	120.88	106.468	0.8
2019-06-28_C2	Track_106	2005	2022	450.921	61.934	0.85
2019-06-28_C2	Track_174	2314	2332	164.686	144.445	0.9
2019-06-28_C2	Track_4031	8188	8208	77.265	97.01	1
2019-06-28_C2	Track_3962	8128	8148	78.301	97.099	1
2019-06-28_C2	Track_22	598	619	300.343	170.402	1.05
2019-06-28_C2	many tracks	9225	9247	180.947	69.605	1.1
2019-06-28_C2	Track_3873	8052	8075	78.289	97.082	1.15
2019-06-28_C2	Track_5028	8930	8955	102.162	177.985	1.25
2019-06-28_C2	many tracks	8396	8421	88.202	108.304	1.25
2019-06-28_C2	Track_1523	5293	5318	120.95	106.727	1.25
2019-06-28_C2	Track_8440	11093	11119	232.204	231.243	1.3
2019-06-28_C2	Track_3989	8149	8175	78.448	97.004	1.3
2019-06-28_C2	Track_4133	8267	8300	75.606	98.136	1.65
2019-06-28_C2	many tracks	8623	8664	144.078	115.282	2.05
2019-06-28_C2	Track_1574	5364	5410	442.369	15.491	2.3
2019-06-28_C2	Track_154	2225	2279	367.455	147.038	2.7
2019-06-28_C2	Track_1421	5146	5242	101.262	6.774	4.8
2019-06-28_C2	Track_137	2160	2309	104.296	242.857	7.45
2019-06-28_C2	Track_182	2345	2534	279.15	210.306	9.45
2019-06-28_C2	Track_15	459	654	317.109	72.403	9.75
2019-06-28_C2	Track_1851	5743	6076	431.249	39.045	16.65
2019-06-28_C2	many tracks	3186	3608	104.459	127.068	21.1
2019-06-28_C2	Track_5	288	1223	261.033	124.668	46.75
2019-06-28_C2	Track_3565	7770	9041	337.825	48.456	63.55
2019-06-28_C2	many tracks	9319	11999	187.813	74.003	134
2019-06-28_C2	Track_5450	9197	11999	44.052	173.894	140.1
2019-06-28_C2	Track_5400	9165	11999	172.888	153.234	141.7
2019-06-28_C2	Track_5306	9112	11999	53.817	47.16	144.35
2019-06-28_C2	Track_5011	8917	11999	166.209	205.278	154.1
2019-06-28_C2	Track_4502	8563	11999	297.976	148.09	171.8
2019-06-28_C2	Track_4318	8413	11999	132.727	63.313	179.3
2019-06-28_C2	Track_4292	8388	11999	45.146	230.846	180.55
2019-06-28_C2	Track_4206	8328	11999	206.937	187.139	183.55
2019-06-28_C2	Track_4156	8290	11999	71.005	216.018	185.45
2019-06-28_C2	Track_3987	8147	11999	374.767	80.122	192.6
2019-06-28_C2	Track_3965	8132	11999	169.971	61.357	193.35
2019-06-28_C2	Track_3839	8028	11999	249.379	196.153	198.55
2019-06-28_C2	Track_3718	7925	11999	138.275	15.444	203.7
2019-06-28_C2	Track_3534	7731	11999	23.927	46.73	213.4
2019-06-28_C2	many tracks	7706	11999	389.753	94.579	214.65
2019-06-28_C2	many tracks	7637	11999	181.599	51.585	218.1
2019-06-28_C2	Track_3276	7504	11999	137.965	217.15	224.75
2019-06-28_C2	Track_3234	7467	11999	289.794	144.678	226.6
2019-06-28_C2	many tracks	7461	11999	494.165	19.853	226.9
2019-06-28_C2	Track_3186	7421	11999	138.247	108.83	228.9
2019-06-28_C2	many tracks	7408	11999	53	75.466	229.55
2019-06-28_C2	Track_3011	7207	11999	479.406	48.94	239.6
2019-06-28_C2	many tracks	7102	11999	74.998	43.397	244.85
2019-06-28_C2	Track_2924	7102	11999	151.006	84.014	244.85
2019-06-28_C2	many tracks	7051	11999	174.738	189.671	247.4
2019-06-28_C2	Track_2842	7005	11999	148.522	10.132	249.7
2019-06-28_C2	Track_2809	6963	11999	40.959	104.352	251.8
2019-06-28_C2	Track_2764	6917	11999	112.093	85.803	254.1
2019-06-28_C2	Track_2758	6915	11999	18.843	29.305	254.2
2019-06-28_C2	Track_2643	6764	11999	38.021	219.04	261.75
2019-06-28_C2	Track_2537	6648	11999	324.657	55.01	267.55
2019-06-28_C2	many tracks	6628	11999	432.902	73.772	268.55
2019-06-28_C2	Track_2500	6610	11999	96.886	138.58	269.45
2019-06-28_C2	many tracks	6575	11999	56.542	210.52	271.2
2019-06-28_C2	many tracks	6500	11999	476.081	155.324	274.95
2019-06-28_C2	Track_2369	6438	11999	323.239	14.085	278.05
2019-06-28_C2	Track_2303	6363	11999	238.616	133.135	281.8
2019-06-28_C2	Track_2289	6345	11999	110.582	113.501	282.7
2019-06-28_C2	Track_2235	6274	11999	101.134	63.569	286.25
2019-06-28_C2	Track_2233	6272	11999	245.383	102.236	286.35
2019-06-28_C2	Track_2226	6263	11999	63.796	230.973	286.8
2019-06-28_C2	Track_2138	6149	11999	394.949	113.095	292.5
2019-06-28_C2	Track_2105	6114	11999	290.782	111.877	294.25
2019-06-28_C2	Track_2106	6113	11999	352.094	196.602	294.3
2019-06-28_C2	many tracks	6058	11999	493.04	102.398	297.05
2019-06-28_C2	Track_2052	6053	11999	93.014	58.528	297.3
2019-06-28_C2	Track_1885	5796	11999	126.905	113.838	310.15
2019-06-28_C2	Track_1860	5756	11999	243.707	23.256	312.15
2019-06-28_C2	Track_1767	5622	11999	259.275	98.889	318.85
2019-06-28_C2	Track_1724	5556	11999	39.732	54.253	322.15
2019-06-28_C2	many tracks	5452	11999	96.774	33.717	327.35
2019-06-28_C2	Track_1631	5425	11999	124.944	202.974	328.7
2019-06-28_C2	Track_1626	5418	11999	436.757	19.896	329.05
2019-06-28_C2	Track_1623	5415	11999	119.962	106.301	329.2
2019-06-28_C2	many tracks	5344	11999	458.821	50.443	332.75
2019-06-28_C2	Track_1460	5195	11999	261.944	154.476	340.2
2019-06-28_C2	many tracks	5162	11999	84.353	157.465	341.85
2019-06-28_C2	many tracks	5029	11999	328.413	43.036	348.5
2019-06-28_C2	Track_1298	4961	11999	407.181	81.749	351.9
2019-06-28_C2	many tracks	4935	11999	432.22	107.235	353.2
2019-06-28_C2	many tracks	4810	11999	435.293	247.04	359.45
2019-06-28_C2	many tracks	4789	11999	212.58	222.771	360.5
2019-06-28_C2	many tracks	4765	11999	427.052	194.098	361.7
2019-06-28_C2	Track_1162	4739	11999	194.911	20.998	363
2019-06-28_C2	Track_1092	4637	11999	312.264	61.639	368.1
2019-06-28_C2	many tracks	4516	11999	375.831	219.818	374.15
2019-06-28_C2	many tracks	4446	11999	23.624	7.623	377.65
2019-06-28_C2	many tracks	4281	11999	179.05	103.85	385.9
2019-06-28_C2	Track_842	4174	11999	153.186	78	391.25
2019-06-28_C2	many tracks	4151	11999	164.904	160.06	392.4
2019-06-28_C2	Track_819	4121	11999	264.732	40.112	393.9
2019-06-28_C2	Track_743	3976	11999	215.208	194.883	401.15
2019-06-28_C2	many tracks	3929	11999	503.166	101.652	403.5
2019-06-28_C2	many tracks	3838	11999	305.535	237.783	408.05
2019-06-28_C2	Track_654	3754	11999	356.192	98.744	412.25
2019-06-28_C2	Track_609	3652	11999	120.647	24.151	417.35
2019-06-28_C2	Track_601	3638	11999	303.126	50.509	418.05
2019-06-28_C2	Track_593	3621	11999	65.375	22.084	418.9
2019-06-28_C2	Track_470	3223	11999	82.108	177.104	438.8
2019-06-28_C2	Track_412	3053	11999	187.781	56.112	447.3
2019-06-28_C2	many tracks	2937	11999	492.555	156.441	453.1
2019-06-28_C2	Track_381	2927	11999	380.47	7.127	453.6
2019-06-28_C2	many tracks	2879	11999	373.225	119.415	456
2019-06-28_C2	many tracks	2846	11999	422.216	190.132	457.65
2019-06-28_C2	many tracks	2750	11999	294.783	193.859	462.45
2019-06-28_C2	Track_314	2659	11999	162.126	142.912	467
2019-06-28_C2	Track_302	2637	11999	250.745	125.03	468.1
2019-06-28_C2	many tracks	2568	11999	458.701	116.489	471.55
2019-06-28_C2	many tracks	2537	11999	221.635	39.754	473.1
2019-06-28_C2	Track_236	2466	11999	230.034	9.265	476.65
2019-06-28_C2	Track_214	2413	11999	224.635	65.053	479.3
2019-06-28_C2	many tracks	2379	11999	444.309	74.297	481
2019-06-28_C2	Track_188	2363	11999	18.792	236.756	481.8
2019-06-28_C2	Track_178	2324	11999	40.083	166.641	483.75
2019-06-28_C2	Track_113	2030	11999	320.113	112.228	498.45
2019-06-28_C2	many tracks	2001	11999	99.339	27.722	499.9
2019-06-28_C2	Track_98	1942	11999	263.521	184.962	502.85
2019-06-28_C2	many tracks	1908	11999	340.18	56.59	504.55
2019-06-28_C2	Track_9893	1874	11999	443.57	214.546	506.25
2019-06-28_C2	many tracks	1799	11999	360.279	210.79	510
2019-06-28_C2	Track_83	1773	11999	188.585	98.905	511.3
2019-06-28_C2	Track_82	1730	11999	71.11	58.659	513.45
2019-06-28_C2	many tracks	1545	11999	336.916	94.372	522.7
2019-06-28_C2	Track_73	1502	11999	406.18	201.14	524.85
2019-06-28_C2	many tracks	1468	11999	394.193	223.236	526.55
2019-06-28_C2	many tracks	1429	11999	458.183	163.33	528.5
2019-06-28_C2	Track_67	1389	11999	400.115	73.202	530.5
2019-06-28_C2	Track_66	1382	11999	46.47	143.109	530.85
2019-06-28_C2	many tracks	1219	11999	343.543	236.519	539
2019-06-28_C2	many tracks	1156	11999	31.337	17.418	542.15
2019-06-28_C2	many tracks	1103	11999	380.971	25.954	544.8
2019-06-28_C2	Track_52	1012	11999	82.011	79.072	549.35
2019-06-28_C2	Track_51	1001	11999	83.103	133.618	549.9
2019-06-28_C2	Track_49	972	11999	326.207	84.156	551.35
2019-06-28_C2	Track_47	822	11999	140.898	148.844	558.85
2019-06-28_C2	many tracks	792	11999	406.445	139.809	560.35
2019-06-28_C2	Track_39	738	11999	28.725	111.423	563.05
2019-06-28_C2	Track_36	721	11999	150.788	134.59	563.9
2019-06-28_C2	Track_18	557	11999	343.248	24.25	572.1
2019-06-28_C2	many tracks	46	11999	252.102	144.484	597.65
2019-06-28_C2	Track_1	25	11999	93.08	50.245	598.7
2019-06-28_C2	Track_0	0	11999	145.805	75.569	599.95
2019-06-28_C4	Track_1390	10820	10822	164.997	146.158	0.1
2019-06-28_C4	Track_1826	10790	10792	399.993	89.777	0.1
2019-06-28_C4	Track_1689	10295	10297	428.369	91.586	0.1
2019-06-28_C4	Track_1598	10022	10024	359.712	5.354	0.1
2019-06-28_C4	Track_1475	9605	9607	361.408	90.023	0.1
2019-06-28_C4	Track_946	9586	9588	100.255	245.504	0.1
2019-06-28_C4	Track_1429	9453	9455	408.122	38.919	0.1
2019-06-28_C4	Track_579	8273	8275	239.878	20.61	0.1
2019-06-28_C4	Track_581	8270	8272	81.871	234.373	0.1
2019-06-28_C4	Track_505	7965	7967	183.334	35.377	0.1
2019-06-28_C4	Track_482	7906	7908	130.246	88.335	0.1
2019-06-28_C4	Track_456	7699	7701	188.19	49.511	0.1
2019-06-28_C4	Track_438	7491	7493	113.662	35.61	0.1
2019-06-28_C4	Track_424	7315	7317	104.799	184.254	0.1
2019-06-28_C4	Track_842	7307	7309	371.048	113.124	0.1
2019-06-28_C4	Track_828	7270	7272	365.238	214.88	0.1
2019-06-28_C4	Track_382	6533	6535	251.753	6.455	0.1
2019-06-28_C4	Track_362	6295	6297	55.955	54.474	0.1
2019-06-28_C4	Track_339	5838	5840	29.657	217.392	0.1
2019-06-28_C4	Track_324	5706	5708	194.694	10.906	0.1
2019-06-28_C4	Track_470	5469	5471	259.192	46.516	0.1
2019-06-28_C4	Track_466	5423	5425	386.458	224.501	0.1
2019-06-28_C4	Track_277	4964	4966	236.898	168.955	0.1
2019-06-28_C4	Track_258	4603	4605	195.071	43.782	0.1
2019-06-28_C4	Track_208	3833	3835	122.155	34.794	0.1
2019-06-28_C4	Track_223	3693	3695	279.192	53.967	0.1
2019-06-28_C4	Track_192	3507	3509	142.757	108.222	0.1
2019-06-28_C4	Track_188	3458	3460	251.156	58.943	0.1
2019-06-28_C4	Track_163	3107	3109	138.332	251.709	0.1
2019-06-28_C4	Track_125	2461	2463	25.359	107.498	0.1
2019-06-28_C4	Track_107	2024	2026	131.74	97.007	0.1
2019-06-28_C4	Track_102	1979	1981	244.542	166.617	0.1
2019-06-28_C4	Track_105	1915	1917	308.98	20.981	0.1
2019-06-28_C4	Track_96	1800	1802	216.469	178.996	0.1
2019-06-28_C4	Track_76	1611	1613	307.864	115.593	0.1
2019-06-28_C4	Track_40	944	946	427.099	154.8	0.1
2019-06-28_C4	Track_1732	11597	11600	227.201	196.034	0.15
2019-06-28_C4	Track_1292	10526	10529	165.226	155.517	0.15
2019-06-28_C4	Track_1656	10207	10210	482.171	182.276	0.15
2019-06-28_C4	Track_1310	9019	9022	332.947	240.331	0.15
2019-06-28_C4	Track_712	6850	6853	427.848	153.82	0.15
2019-06-28_C4	Track_283	5100	5103	181.428	214.116	0.15
2019-06-28_C4	Track_242	4462	4465	232.222	66.673	0.15
2019-06-28_C4	Track_217	4084	4087	41.264	132.71	0.15
2019-06-28_C4	Track_129	2250	2253	424.297	173.6	0.15
2019-06-28_C4	Track_88	1484	1487	151.271	41.407	0.15
2019-06-28_C4	Track_41	991	994	30.003	145.047	0.15
2019-06-28_C4	Track_1293	10526	10530	166.054	122.99	0.2
2019-06-28_C4	Track_1184	10214	10218	123.571	90.544	0.2
2019-06-28_C4	Track_440	7506	7510	103.375	34.576	0.2
2019-06-28_C4	Track_715	6860	6864	435.764	129.657	0.2
2019-06-28_C4	Track_607	6259	6263	395.017	31.119	0.2
2019-06-28_C4	Track_524	5791	5795	379.136	112.626	0.2
2019-06-28_C4	Track_304	5361	5365	146.279	12.329	0.2
2019-06-28_C4	Track_213	4043	4047	239.538	138.055	0.2
2019-06-28_C4	Track_130	2580	2584	185.449	61.904	0.2
2019-06-28_C4	Track_39	936	940	426.211	154.748	0.2
2019-06-28_C4	Track_414	7219	7224	217.458	190.56	0.25
2019-06-28_C4	Track_291	5164	5169	173.225	222.289	0.25
2019-06-28_C4	Track_102	1897	1902	505.647	229.187	0.25
2019-06-28_C4	Track_90	1825	1830	427.454	153.597	0.25
2019-06-28_C4	Track_1939	11153	11159	494.991	128.814	0.3
2019-06-28_C4	Track_2080	11658	11665	299.216	223.878	0.35
2019-06-28_C4	Track_498	5621	5628	441.162	65.373	0.35
2019-06-28_C4	Track_89	1815	1822	425.994	154.485	0.35
2019-06-28_C4	Track_171	2854	2862	262.23	60.189	0.4
2019-06-28_C4	Track_982	7786	7795	428.495	154.319	0.45
2019-06-28_C4	Track_1232	8733	8743	506.434	59.622	0.5
2019-06-28_C4	Track_433	7451	7461	29.176	95.32	0.5
2019-06-28_C4	Track_248	4522	4533	81.489	149.01	0.55
2019-06-28_C4	Track_1040	9887	9899	77.388	249.577	0.6
2019-06-28_C4	Track_135	2311	2327	327.612	60.746	0.8
2019-06-28_C4	Track_20	473	493	257.859	121.698	1
2019-06-28_C4	Track_207	3500	3521	341.753	142.976	1.05
2019-06-28_C4	Track_620	8433	8458	24.23	238.489	1.25
2019-06-28_C4	Track_171	3236	3261	200.063	176.508	1.25
2019-06-28_C4	many tracks	10810	10836	493.984	187.82	1.3
2019-06-28_C4	Track_1556	9894	9921	286.876	83.705	1.35
2019-06-28_C4	Track_289	4240	4269	406.324	70.525	1.45
2019-06-28_C4	Track_89	1577	1606	156.061	28.107	1.45
2019-06-28_C4	Track_182	3329	3359	230.299	133.751	1.5
2019-06-28_C4	Track_1940	11157	11195	380.421	127.473	1.9
2019-06-28_C4	Track_1824	10787	10827	436.372	84.289	2
2019-06-28_C4	Track_1776	10604	10661	361.185	201.243	2.85
2019-06-28_C4	Track_966	7725	7790	356.703	203.919	3.25
2019-06-28_C4	Track_245	3926	3999	273.578	93.922	3.65
2019-06-28_C4	Track_124	2446	2522	83.702	107.393	3.8
2019-06-28_C4	many tracks	5331	5415	39.186	115.055	4.2
2019-06-28_C4	Track_27	472	568	116.707	87.793	4.8
2019-06-28_C4	Track_6	256	356	417.305	50.898	5
2019-06-28_C4	Track_286	5118	5250	15.922	116.647	6.6
2019-06-28_C4	Track_209	3881	4032	76.602	132.028	7.55
2019-06-28_C4	Track_209	3536	3769	313.111	239.493	11.65
2019-06-28_C4	Track_800	9080	9707	77.868	113.066	31.35
2019-06-28_C4	many tracks	9564	11999	468.381	169.474	121.75
2019-06-28_C4	Track_1432	9463	11999	500.14	133.826	126.8
2019-06-28_C4	Track_1422	9431	11999	444.002	215.683	128.4
2019-06-28_C4	many tracks	9425	11999	228	254	128.7
2019-06-28_C4	Track_1399	9351	11999	377.564	116.266	132.4
2019-06-28_C4	many tracks	9196	11999	45.29	186.196	140.15
2019-06-28_C4	Track_1319	9051	11999	278.946	242.694	147.4
2019-06-28_C4	Track_1313	9029	11999	332.28	238.755	148.5
2019-06-28_C4	Track_1236	8747	11999	273.059	180.95	162.6
2019-06-28_C4	Track_624	8454	11999	146.857	7.792	177.25
2019-06-28_C4	Track_619	8427	11999	251.035	184.738	178.6
2019-06-28_C4	Track_1160	8423	11999	364.926	99.339	178.8
2019-06-28_C4	Track_612	8395	11999	194.224	183.963	180.2
2019-06-28_C4	Track_589	8305	11999	65.025	47.147	184.7
2019-06-28_C4	Track_570	8250	11999	215.306	111.45	187.45
2019-06-28_C4	many tracks	8174	11999	325.398	9.487	191.25
2019-06-28_C4	many tracks	8091	11999	202.767	128.942	195.4
2019-06-28_C4	many tracks	7972	11999	192.909	45.065	201.35
2019-06-28_C4	Track_1025	7876	11999	463.197	4.366	206.15
2019-06-28_C4	Track_948	7668	11999	275.14	11.864	216.55
2019-06-28_C4	many tracks	7597	11999	466.159	176.536	220.1
2019-06-28_C4	Track_444	7558	11999	1.989	206.838	222.05
2019-06-28_C4	Track_442	7557	11999	200.726	218.804	222.1
2019-06-28_C4	many tracks	7497	11999	472.538	168.493	225.1
2019-06-28_C4	Track_430	7421	11999	114.59	27.586	228.9
2019-06-28_C4	Track_427	7339	11999	105.238	182.151	233
2019-06-28_C4	many tracks	7269	11999	473.438	217.602	236.5
2019-06-28_C4	Track_818	7243	11999	263.232	166.734	237.8
2019-06-28_C4	Track_809	7219	11999	330.708	9.203	239
2019-06-28_C4	Track_409	7148	11999	247.153	216.165	242.55
2019-06-28_C4	Track_408	7128	11999	159.09	123.141	243.55
2019-06-28_C4	Track_406	7110	11999	210.003	16.686	244.45
2019-06-28_C4	many tracks	6947	11999	331.084	121.57	252.6
2019-06-28_C4	many tracks	6858	11999	461.244	227.879	257.05
2019-06-28_C4	Track_708	6824	11999	445.059	128.728	258.75
2019-06-28_C4	many tracks	6704	11999	302.311	240.41	264.75
2019-06-28_C4	many tracks	6704	11999	441.755	226.793	264.75
2019-06-28_C4	Track_666	6621	11999	386.092	12.698	268.9
2019-06-28_C4	Track_383	6551	11999	217.601	197.921	272.4
2019-06-28_C4	Track_629	6429	11999	381.217	63.305	278.5
2019-06-28_C4	Track_625	6397	11999	271.895	239.156	280.1
2019-06-28_C4	Track_363	6309	11999	57.736	74.855	284.5
2019-06-28_C4	Track_353	6155	11999	218.029	59.975	292.2
2019-06-28_C4	Track_351	6107	11999	210.773	119.909	294.6
2019-06-28_C4	Track_564	6028	11999	334.326	135.802	298.55
2019-06-28_C4	Track_549	5941	11999	284.078	73.639	302.9
2019-06-28_C4	Track_543	5879	11999	495.546	161.312	306
2019-06-28_C4	Track_539	5869	11999	279.311	118.541	306.5
2019-06-28_C4	Track_523	5776	11999	369.346	35.997	311.15
2019-06-28_C4	Track_331	5769	11999	149.985	161.683	311.5
2019-06-28_C4	Track_330	5756	11999	36.453	140.535	312.15
2019-06-28_C4	Track_517	5739	11999	395.974	12.938	313
2019-06-28_C4	Track_516	5736	11999	305.812	114.028	313.15
2019-06-28_C4	Track_325	5723	11999	144.262	137.051	313.8
2019-06-28_C4	Track_321	5693	11999	169.407	160.018	315.3
2019-06-28_C4	Track_502	5658	11999	483.965	187.117	317.05
2019-06-28_C4	Track_499	5632	11999	303.647	46.084	318.35
2019-06-28_C4	Track_319	5608	11999	99.154	196.086	319.55
2019-06-28_C4	Track_316	5563	11999	253.023	132.917	321.8
2019-06-28_C4	Track_315	5553	11999	75.969	1.714	322.3
2019-06-28_C4	many tracks	5544	11999	409.604	3.242	322.75
2019-06-28_C4	Track_314	5506	11999	235.077	133.919	324.65
2019-06-28_C4	Track_465	5415	11999	257.126	126.418	329.2
2019-06-28_C4	Track_309	5394	11999	60.781	126.939	330.25
2019-06-28_C4	many tracks	5240	11999	306.23	216.289	337.95
2019-06-28_C4	Track_400	5205	11999	414.545	224.863	339.7
2019-06-28_C4	Track_1698	5136	11999	288.225	71.828	343.15
2019-06-28_C4	Track_387	5136	11999	288.117	31.529	343.15
2019-06-28_C4	many tracks	5124	11999	316.691	107.229	343.75
2019-06-28_C4	Track_385	5119	11999	280.054	55.465	344
2019-06-28_C4	Track_381	5097	11999	317.22	187.102	345.1
2019-06-28_C4	many tracks	5073	11999	271.988	160.499	346.3
2019-06-28_C4	Track_279	4979	11999	90.566	83.942	351
2019-06-28_C4	Track_362	4955	11999	293.81	52.281	352.2
2019-06-28_C4	Track_357	4932	11999	440.985	219.62	353.35
2019-06-28_C4	Track_341	4737	11999	262.406	252.798	363.1
2019-06-28_C4	Track_270	4726	11999	229.445	6.282	363.65
2019-06-28_C4	Track_268	4679	11999	40.027	126.491	366
2019-06-28_C4	Track_332	4626	11999	415.181	248.466	368.65
2019-06-28_C4	Track_328	4583	11999	415.975	219.334	370.8
2019-06-28_C4	Track_326	4574	11999	404.967	123.724	371.25
2019-06-28_C4	Track_253	4572	11999	172.806	11.538	371.35
2019-06-28_C4	Track_252	4550	11999	78.007	192.501	372.45
2019-06-28_C4	Track_236	4412	11999	32.839	162.86	379.35
2019-06-28_C4	Track_235	4387	11999	68.007	248.919	380.6
2019-06-28_C4	Track_233	4344	11999	129.254	78.067	382.75
2019-06-28_C4	Track_296	4340	11999	406.231	131.386	382.95
2019-06-28_C4	Track_227	4258	11999	192.898	23.719	387.05
2019-06-28_C4	many tracks	4230	11999	343.602	75.098	388.45
2019-06-28_C4	many tracks	4159	11999	60.104	184.56	392
2019-06-28_C4	Track_274	4100	11999	427.893	235.941	394.95
2019-06-28_C4	Track_269	4086	11999	409.019	152.763	395.65
2019-06-28_C4	Track_266	4073	11999	317.609	220.665	396.3
2019-06-28_C4	many tracks	4046	11999	282.784	151.165	397.65
2019-06-28_C4	Track_212	3976	11999	73.928	15.15	401.15
2019-06-28_C4	Track_210	3890	11999	11.984	47.212	405.45
2019-06-28_C4	Track_240	3880	11999	311.397	16.728	405.95
2019-06-28_C4	Track_207	3831	11999	109.946	145.727	408.4
2019-06-28_C4	Track_206	3810	11999	188.164	40.281	409.45
2019-06-28_C4	many tracks	3785	11999	477.899	140.883	410.7
2019-06-28_C4	Track_203	3748	11999	117.583	80.996	412.55
2019-06-28_C4	Track_202	3733	11999	108.903	160.318	413.3
2019-06-28_C4	Track_201	3731	11999	137.77	163.713	413.4
2019-06-28_C4	Track_227	3705	11999	329.273	182.146	414.7
2019-06-28_C4	Track_225	3698	11999	275.252	57.832	415.05
2019-06-28_C4	many tracks	3681	11999	480.132	131.339	415.9
2019-06-28_C4	Track_194	3541	11999	22.369	139.884	422.9
2019-06-28_C4	Track_187	3374	11999	108.179	223.199	431.25
2019-06-28_C4	Track_157	2948	11626	200.07	232.328	433.9
2019-06-28_C4	Track_178	3305	11999	155.315	195.916	434.7
2019-06-28_C4	Track_176	3292	11999	148.31	129.034	435.35
2019-06-28_C4	Track_194	3289	11999	259.399	59.041	435.5
2019-06-28_C4	Track_167	3189	11999	14.519	210.617	440.5
2019-06-28_C4	Track_162	3081	11999	90.717	48.643	445.9
2019-06-28_C4	many tracks	3046	11999	54.097	216.684	447.65
2019-06-28_C4	many tracks	3005	11999	274.392	253.095	449.7
2019-06-28_C4	Track_179	3003	11999	259.856	15.651	449.8
2019-06-28_C4	Track_178	2998	11999	333.854	162.43	450.05
2019-06-28_C4	Track_160	2965	11999	191.056	134.292	451.7
2019-06-28_C4	Track_159	2958	11999	127.178	106.119	452.05
2019-06-28_C4	many tracks	2949	11999	199.743	231.966	452.5
2019-06-28_C4	many tracks	2898	11999	305.437	32.855	455.05
2019-06-28_C4	many tracks	2871	11999	352.091	240.276	456.4
2019-06-28_C4	Track_148	2860	11999	205.372	9.258	456.95
2019-06-28_C4	many tracks	2785	11999	340.913	133.318	460.7
2019-06-28_C4	Track_139	2758	11999	4.526	38.926	462.05
2019-06-28_C4	Track_165	2738	11999	325.148	49.339	463.05
2019-06-28_C4	many tracks	2618	11999	102.199	84.558	469.05
2019-06-28_C4	Track_128	2562	11999	196.96	78.943	471.85
2019-06-28_C4	Track_147	2421	11999	271.256	206.576	478.9
2019-06-28_C4	many tracks	2395	11999	342.888	74.259	480.2
2019-06-28_C4	Track_143	2388	11999	454.518	7.313	480.55
2019-06-28_C4	Track_141	2374	11999	339.999	19.086	481.25
2019-06-28_C4	Track_137	2347	11999	374.762	142.828	482.6
2019-06-28_C4	many tracks	2320	11999	463.908	196.784	483.95
2019-06-28_C4	many tracks	2063	11999	475.372	201.197	496.8
2019-06-28_C4	Track_106	2019	11999	95.669	7.948	499
2019-06-28_C4	Track_104	1913	11999	257.301	74.403	504.3
2019-06-28_C4	Track_92	1829	11999	422.199	31.938	508.5
2019-06-28_C4	Track_94	1694	11999	5.147	252.493	515.25
2019-06-28_C4	many tracks	1598	11999	492.01	235.653	520.05
2019-06-28_C4	Track_70	1522	11999	497.764	239.875	523.85
2019-06-28_C4	many tracks	1493	11999	437.128	148.335	525.3
2019-06-28_C4	many tracks	1480	11999	476.673	179.518	525.95
2019-06-28_C4	Track_62	1375	11999	412.84	121.327	531.2
2019-06-28_C4	Track_72	1312	11999	236.944	236.29	534.35
2019-06-28_C4	Track_56	1291	11999	508.431	172.705	535.4
2019-06-28_C4	many tracks	1228	11999	211.362	241.522	538.55
2019-06-28_C4	Track_377	1200	11999	5.224	100.08	539.95
2019-06-28_C4	Track_57	1199	11999	5.026	100.163	540
2019-06-28_C4	Track_54	1168	11999	165.242	101.248	541.55
2019-06-28_C4	Track_53	1164	11999	181.255	65.663	541.75
2019-06-28_C4	Track_44	1152	11999	423.719	139.855	542.35
2019-06-28_C4	Track_49	1072	11999	218.2	12.541	546.35
2019-06-28_C4	Track_48	1056	11999	131.836	166.914	547.15
2019-06-28_C4	many tracks	955	11999	469.859	10.006	552.2
2019-06-28_C4	many tracks	869	11999	22.285	193.605	556.5
2019-06-28_C4	many tracks	768	11999	477.824	89.839	561.55
2019-06-28_C4	Track_32	731	11999	286.839	205.192	563.4
2019-06-28_C4	many tracks	520	11999	443.142	222.603	573.95
2019-06-28_C4	Track_28	515	11999	49.398	183.965	574.2
2019-06-28_C4	many tracks	489	11999	496.495	190.638	575.5
2019-06-28_C4	Track_26	462	11999	161.942	5.768	576.85
2019-06-28_C4	Track_14	456	11999	273.075	212.143	577.15
2019-06-28_C4	many tracks	449	11999	479.086	52.526	577.5
2019-06-28_C4	Track_11	444	11999	332.426	155.33	577.75
2019-06-28_C4	Track_21	424	11999	156.301	6.714	578.75
2019-06-28_C4	many tracks	368	11999	129.062	122.917	581.55
2019-06-28_C4	many tracks	364	11999	206.883	179.439	581.75
2019-06-28_C4	many tracks	327	11999	455.426	14.444	583.6
2019-06-28_C4	Track_8	290	11999	489.97	154.766	585.45
2019-06-28_C4	Track_7	271	11999	432.958	7.324	586.4
2019-06-28_C4	Track_12	266	11999	105.408	136.585	586.65
2019-06-28_C4	many tracks	241	11999	95.044	251.493	587.9
2019-06-28_C4	Track_5	197	11999	345.92	121.447	590.1
2019-06-28_C4	Track_4	128	11999	291.023	195.966	593.55
2019-06-28_C4	Track_5	94	11999	145.215	199.202	595.25
2019-06-28_C4	Track_2	54	11999	448.257	55.227	597.25
2019-06-28_C4	Track_0	0	11999	5.766	28.56	599.95
2019-06-28_C4	Track_1	0	11999	28.016	8.558	599.95
2019-06-28_C4	Track_0	0	11999	462.91	136.15	599.95
Track data for the interaction of 100 nm hard corona particles interacting with lipid bilayers
experiment id	Track label	Start frame	Stop frame	y position (avg)	x position (avg)	Track duration (s)
2019-10-30_C2	Track_14	681	683	180.338	55.383	0.1
2019-10-30_C2	Track_49	1633	1635	247.993	85.737	0.1
2019-10-30_C2	Track_124	4063	4065	187.988	168.575	0.1
2019-10-30_C2	Track_140	4352	4354	254.353	146.89	0.1
2019-10-30_C2	Track_219	6364	6366	50.019	226.564	0.1
2019-10-30_C2	Track_226	6552	6554	190.485	210.769	0.1
2019-10-30_C2	Track_282	7418	7420	223.637	182.817	0.1
2019-10-30_C2	Track_298	7579	7581	242.221	130.78	0.1
2019-10-30_C2	Track_355	8832	8834	228.125	72.662	0.1
2019-10-30_C2	Track_405	9606	9608	25.986	71.715	0.1
2019-10-30_C2	Track_408	9618	9620	157.335	134.835	0.1
2019-10-30_C2	Track_476	10631	10633	386.108	247.341	0.1
2019-10-30_C2	Track_59	1864	1867	382.2	173.356	0.15
2019-10-30_C2	Track_146	4573	4576	426.028	206.656	0.15
2019-10-30_C2	Track_201	5960	5963	134.278	239.256	0.15
2019-10-30_C2	Track_294	7528	7531	264.647	152.406	0.15
2019-10-30_C2	Track_361	8899	8902	231.072	62.992	0.15
2019-10-30_C2	Track_392	9430	9433	248.215	63.312	0.15
2019-10-30_C2	Track_491	10741	10744	87.034	109.077	0.15
2019-10-30_C2	Track_557	11777	11780	112.194	54.264	0.15
2019-10-30_C2	Track_29	978	982	170.052	130.55	0.2
2019-10-30_C2	Track_98	3361	3365	496.892	66.074	0.2
2019-10-30_C2	Track_181	5328	5332	243.535	157.748	0.2
2019-10-30_C2	Track_223	6491	6495	376.656	182.523	0.2
2019-10-30_C2	Track_246	6789	6793	318.624	102.357	0.2
2019-10-30_C2	Track_274	7329	7333	144.543	243.057	0.2
2019-10-30_C2	Track_357	8837	8841	229.266	65.613	0.2
2019-10-30_C2	Track_409	9621	9625	254.319	69.893	0.2
2019-10-30_C2	Track_413	9632	9636	256.477	79.739	0.2
2019-10-30_C2	Track_456	10340	10344	99.996	94.124	0.2
2019-10-30_C2	Track_470	10539	10543	305.622	201.505	0.2
2019-10-30_C2	Track_65	2011	2016	459.708	62.004	0.25
2019-10-30_C2	Track_253	6927	6932	258.051	35.344	0.25
2019-10-30_C2	Track_329	8180	8185	97.016	75.841	0.25
2019-10-30_C2	Track_489	10739	10744	279.426	72.146	0.25
2019-10-30_C2	Track_521	11161	11166	404.943	121.579	0.25
2019-10-30_C2	Track_154	4748	4754	234.667	250.14	0.3
2019-10-30_C2	Track_354	8816	8822	228.073	78.517	0.3
2019-10-30_C2	Track_106	3679	3686	453.063	222.594	0.35
2019-10-30_C2	Track_107	3727	3734	276.181	54.578	0.35
2019-10-30_C2	Track_147	4578	4585	427.181	203.51	0.35
2019-10-30_C2	Track_22	879	887	79.912	187.055	0.4
2019-10-30_C2	Track_229	6561	6569	195.597	207.12	0.4
2019-10-30_C2	Track_375	9212	9220	306.733	131.081	0.4
2019-10-30_C2	many tracks	4047	4056	284.503	30.583	0.45
2019-10-30_C2	Track_193	5588	5598	353.244	178.139	0.5
2019-10-30_C2	Track_393	9434	9444	250.941	60.216	0.5
2019-10-30_C2	Track_13	383	394	101.204	161.161	0.55
2019-10-30_C2	Track_326	8132	8143	385.762	232.932	0.55
2019-10-30_C2	Track_397	9450	9468	246.666	67.57	0.9
2019-10-30_C2	Track_543	11452	11472	120.422	137.041	1
2019-10-30_C2	Track_353	8793	8817	170.636	182.168	1.2
2019-10-30_C2	Track_54	1754	1787	321.261	168.004	1.65
2019-10-30_C2	many tracks	801	836	500.265	166.63	1.75
2019-10-30_C2	Track_195	5694	5750	30.996	154.711	2.8
2019-10-30_C2	many tracks	4193	4256	419.02	27.02	3.15
2019-10-30_C2	Track_255	6948	7019	349.152	182.076	3.55
2019-10-30_C2	Track_114	3965	4039	410.679	83.674	3.7
2019-10-30_C2	Track_73	2295	2595	236.885	202.781	15
2019-10-30_C2	many tracks	4171	4826	118.141	188.646	32.75
2019-10-30_C2	many tracks	5658	6600	89.666	12.309	47.1
2019-10-30_C2	many tracks	9076	11999	302.67	200.171	146.15
2019-10-30_C2	Track_242	6760	11999	70.378	157.006	261.95
2019-10-30_C2	many tracks	1473	11999	51.897	73.736	526.3
2019-10-30_C2	many tracks	1127	11999	328.244	205.563	543.6
2019-10-30_C2	many tracks	0	11999	180.747	228.756	599.95
2019-10-30_C2	many tracks	0	11999	292.197	230.911	599.95
2019-10-30_C3	Track_655	9487	9489	147.75	117.03	0.1
2019-10-30_C3	Track_624	9003	9005	400.533	224.891	0.1
2019-10-30_C3	Track_585	8538	8540	201.709	22.02	0.1
2019-10-30_C3	Track_581	8515	8517	278.097	129.648	0.1
2019-10-30_C3	Track_537	8222	8224	203.12	137.402	0.1
2019-10-30_C3	Track_505	8003	8005	253.927	28.548	0.1
2019-10-30_C3	Track_470	7446	7448	83.092	99.24	0.1
2019-10-30_C3	Track_450	7229	7231	324.825	179.361	0.1
2019-10-30_C3	Track_369	5479	5481	190.17	87.738	0.1
2019-10-30_C3	Track_362	5399	5401	363.837	145.459	0.1
2019-10-30_C3	Track_360	5376	5378	358.118	147.263	0.1
2019-10-30_C3	Track_335	5149	5151	169.834	223.245	0.1
2019-10-30_C3	Track_314	5036	5038	271.065	92.727	0.1
2019-10-30_C3	Track_307	4937	4939	418.433	115.015	0.1
2019-10-30_C3	Track_301	4911	4913	417.093	103.971	0.1
2019-10-30_C3	Track_269	4527	4529	217.7	176.851	0.1
2019-10-30_C3	Track_253	4285	4287	185.755	15.777	0.1
2019-10-30_C3	Track_252	4284	4286	208.258	90.555	0.1
2019-10-30_C3	Track_245	4222	4224	374.187	70.923	0.1
2019-10-30_C3	Track_195	3398	3400	32.673	173.881	0.1
2019-10-30_C3	Track_174	3087	3089	137.97	132.133	0.1
2019-10-30_C3	Track_154	2879	2881	9.255	22.584	0.1
2019-10-30_C3	Track_126	2504	2506	463.973	200.068	0.1
2019-10-30_C3	Track_117	2391	2393	103.101	179.041	0.1
2019-10-30_C3	Track_113	2272	2274	65.616	35.526	0.1
2019-10-30_C3	Track_71	1599	1601	95.141	195.047	0.1
2019-10-30_C3	Track_55	1170	1172	319.069	72.194	0.1
2019-10-30_C3	Track_46	883	885	334.815	162.993	0.1
2019-10-30_C3	Track_32	647	649	118.873	192.989	0.1
2019-10-30_C3	Track_22	568	570	167.567	84.576	0.1
2019-10-30_C3	Track_715	11295	11298	7.392	115.017	0.15
2019-10-30_C3	Track_647	9436	9439	162.858	7.972	0.15
2019-10-30_C3	Track_548	8298	8301	148.403	81.599	0.15
2019-10-30_C3	Track_458	7329	7332	283.245	32.031	0.15
2019-10-30_C3	Track_91	1964	1967	76.007	166.745	0.15
2019-10-30_C3	Track_73	1642	1645	50.371	95.865	0.15
2019-10-30_C3	Track_693	10558	10562	82.685	250.616	0.2
2019-10-30_C3	Track_654	9510	9514	156.224	13.254	0.2
2019-10-30_C3	Track_631	9090	9094	433.729	152.842	0.2
2019-10-30_C3	Track_607	8766	8770	234.95	52.265	0.2
2019-10-30_C3	Track_220	3849	3853	101.167	242.51	0.2
2019-10-30_C3	Track_93	1990	1994	185.25	46.979	0.2
2019-10-30_C3	Track_687	10370	10375	10.513	168.508	0.25
2019-10-30_C3	Track_662	9729	9734	54.048	90.015	0.25
2019-10-30_C3	Track_432	6703	6709	227.701	31.186	0.3
2019-10-30_C3	Track_684	10326	10334	100.491	23.662	0.4
2019-10-30_C3	Track_14	551	559	393.024	216.18	0.4
2019-10-30_C3	Track_698	10725	10734	425.178	54.987	0.45
2019-10-30_C3	Track_691	10515	10525	295.406	11.412	0.5
2019-10-30_C3	Track_685	10334	10350	19.513	171.406	0.8
2019-10-30_C3	Track_513	8066	8083	135.465	244.778	0.85
2019-10-30_C3	Track_500	7959	7981	255.505	38.418	1.1
2019-10-30_C3	Track_141	2679	2705	255.296	9.806	1.3
2019-10-30_C3	many tracks	8421	8451	203.794	37.332	1.5
2019-10-30_C3	Track_638	9193	9252	146.209	98.608	2.95
2019-10-30_C3	Track_75	1673	1790	221.071	142.344	5.85
2019-10-30_C3	many tracks	3160	3313	485.162	154.536	7.65
2019-10-30_C3	Track_316	5045	5330	405.309	32.671	14.25
2019-10-30_C3	many tracks	7747	11999	1.212	44.764	212.6
2019-10-30_C3	Track_208	3521	11999	410.819	62.623	423.9
2019-10-30_C3	Track_148	2815	11999	295.562	19.985	459.2
2019-10-30_C3	many tracks	624	11999	507.517	52.466	568.75
2019-11-06_C1	Track_51	1198	1200	90.482	11.755	0.1
2019-11-06_C1	Track_99	1425	1427	131.103	241.687	0.1
2019-11-06_C1	Track_211	2428	2430	412.267	68.91	0.1
2019-11-06_C1	Track_275	2819	2821	127.316	110.481	0.1
2019-11-06_C1	Track_326	3002	3004	238.788	239.462	0.1
2019-11-06_C1	Track_355	3070	3072	26.117	160.452	0.1
2019-11-06_C1	Track_438	3356	3358	172.305	158.664	0.1
2019-11-06_C1	Track_443	3373	3375	77.36	86.664	0.1
2019-11-06_C1	Track_669	4359	4361	55.147	70.892	0.1
2019-11-06_C1	Track_693	4474	4476	384.759	22.123	0.1
2019-11-06_C1	Track_709	4497	4499	287.148	24.353	0.1
2019-11-06_C1	Track_751	4807	4809	390.054	6.695	0.1
2019-11-06_C1	Track_946	5718	5720	424.53	101.4	0.1
2019-11-06_C1	Track_954	5752	5754	61.964	202.242	0.1
2019-11-06_C1	Track_997	5943	5945	56.246	90.588	0.1
2019-11-06_C1	Track_1013	6131	6133	307.327	248.506	0.1
2019-11-06_C1	Track_1083	6934	6936	452.821	34.023	0.1
2019-11-06_C1	Track_1163	7532	7534	378.287	60.95	0.1
2019-11-06_C1	Track_1170	7587	7589	170.269	62.771	0.1
2019-11-06_C1	Track_1180	7651	7653	137.918	38.495	0.1
2019-11-06_C1	Track_1188	7682	7684	131.94	40.9	0.1
2019-11-06_C1	Track_1190	7687	7689	133.122	96.159	0.1
2019-11-06_C1	Track_1197	7773	7775	270.823	230.271	0.1
2019-11-06_C1	Track_1208	7980	7982	58.416	121.64	0.1
2019-11-06_C1	Track_1209	7985	7987	348.22	95.653	0.1
2019-11-06_C1	Track_1286	8644	8646	215.084	153.134	0.1
2019-11-06_C1	Track_1382	8995	8997	48.847	70.252	0.1
2019-11-06_C1	Track_1424	9144	9146	333.882	138.068	0.1
2019-11-06_C1	Track_1436	9190	9192	109.526	163.725	0.1
2019-11-06_C1	Track_1591	9669	9671	313.879	47.868	0.1
2019-11-06_C1	Track_1604	9694	9696	52.114	72.628	0.1
2019-11-06_C1	Track_1625	9729	9731	269.395	125.623	0.1
2019-11-06_C1	Track_1912	10371	10373	97.389	71.226	0.1
2019-11-06_C1	Track_1989	10653	10655	158.18	6.849	0.1
2019-11-06_C1	Track_2010	10711	10713	206.83	86.349	0.1
2019-11-06_C1	Track_2180	11323	11325	153.636	235.914	0.1
2019-11-06_C1	Track_2261	11494	11496	146.999	214.749	0.1
2019-11-06_C1	Track_2312	11657	11659	338.914	129.234	0.1
2019-11-06_C1	Track_81	1335	1338	172.105	31.079	0.15
2019-11-06_C1	Track_434	3335	3338	76.155	95.106	0.15
2019-11-06_C1	Track_1149	7428	7431	183.436	39.452	0.15
2019-11-06_C1	Track_1215	8044	8047	373.56	116.209	0.15
2019-11-06_C1	Track_1221	8080	8083	366.218	23.653	0.15
2019-11-06_C1	Track_1342	8825	8828	125.566	61.726	0.15
2019-11-06_C1	Track_1568	9633	9636	250.522	44.976	0.15
2019-11-06_C1	Track_2229	11417	11420	88.996	92.041	0.15
2019-11-06_C1	Track_1	53	57	211.224	56.412	0.2
2019-11-06_C1	Track_41	1093	1097	321.767	211.2	0.2
2019-11-06_C1	Track_235	2610	2614	418.138	196.375	0.2
2019-11-06_C1	Track_323	2992	2996	239.9	239.234	0.2
2019-11-06_C1	Track_454	3418	3422	92.178	88.015	0.2
2019-11-06_C1	Track_544	3761	3765	34.049	181.194	0.2
2019-11-06_C1	Track_605	4010	4014	246.597	119.97	0.2
2019-11-06_C1	many tracks	4604	4608	38.021	154.326	0.2
2019-11-06_C1	Track_1039	6363	6367	166.06	100.17	0.2
2019-11-06_C1	Track_1156	7504	7508	141.528	63.912	0.2
2019-11-06_C1	Track_1168	7546	7550	382.747	71.196	0.2
2019-11-06_C1	Track_1380	8993	8997	374.601	153.949	0.2
2019-11-06_C1	Track_1807	10096	10100	149.358	10.58	0.2
2019-11-06_C1	Track_437	3353	3358	45.243	192.778	0.25
2019-11-06_C1	Track_698	4496	4501	45.362	15.083	0.25
2019-11-06_C1	Track_1155	7476	7481	161.343	21.138	0.25
2019-11-06_C1	Track_1219	8072	8077	375.26	99.613	0.25
2019-11-06_C1	Track_1385	9007	9012	186.251	96.868	0.25
2019-11-06_C1	Track_1437	9189	9194	166.958	43.318	0.25
2019-11-06_C1	Track_1698	9847	9852	252.547	141.361	0.25
2019-11-06_C1	Track_1967	10576	10581	197.224	165.983	0.25
2019-11-06_C1	Track_42	1091	1097	453.286	67.909	0.3
2019-11-06_C1	Track_1328	8759	8765	323.21	241.495	0.3
2019-11-06_C1	Track_1597	9676	9682	46.457	67.111	0.3
2019-11-06_C1	Track_2221	11404	11410	166.707	243.061	0.3
2019-11-06_C1	many tracks	4508	4516	397.884	14.102	0.4
2019-11-06_C1	Track_1355	8916	8924	344.505	154.897	0.4
2019-11-06_C1	Track_1369	8963	8971	185.038	85.457	0.4
2019-11-06_C1	Track_2267	11502	11510	52.539	105.496	0.4
2019-11-06_C1	Track_219	2466	2475	422.744	202.149	0.45
2019-11-06_C1	many tracks	2953	2962	244.651	237.456	0.45
2019-11-06_C1	many tracks	11296	11307	174.255	54.302	0.55
2019-11-06_C1	Track_1409	9091	9104	203.109	117.118	0.65
2019-11-06_C1	Track_1101	7217	7232	149.298	37.506	0.75
2019-11-06_C1	many tracks	11762	11777	350.967	149.57	0.75
2019-11-06_C1	many tracks	5880	5896	308.107	220.584	0.8
2019-11-06_C1	Track_1702	9861	9877	258.31	144.159	0.8
2019-11-06_C1	many tracks	9025	9042	202.846	104.75	0.85
2019-11-06_C1	Track_1400	9063	9086	202.506	118.43	1.15
2019-11-06_C1	many tracks	8955	8988	356.892	218.493	1.65
2019-11-06_C1	Track_1970	10568	10614	445.236	153.981	2.3
2019-11-06_C1	many tracks	4972	5026	77.105	107.302	2.7
2019-11-06_C1	Track_508	3592	3649	38.89	187.127	2.85
2019-11-06_C1	Track_302	2925	3001	34.636	168.101	3.8
2019-11-06_C1	many tracks	5294	5386	290.671	239.577	4.6
2019-11-06_C1	many tracks	2786	2880	377.384	17.525	4.7
2019-11-06_C1	many tracks	5008	5136	334.874	18.89	6.4
2019-11-06_C1	many tracks	1610	1765	126.082	253.179	7.75
2019-11-06_C1	many tracks	3502	3712	257.631	67.364	10.5
2019-11-06_C1	many tracks	9133	9438	208.993	106.465	15.25
2019-11-06_C1	Track_117	1531	1930	134.713	250.998	19.95
2019-11-06_C1	Track_553	3786	4451	143.905	169.926	33.25
2019-11-06_C1	many tracks	9501	11999	428.574	40.446	124.9
2019-11-06_C1	many tracks	3761	11999	224.137	249.21	411.9
2019-11-06_C1	Track_375	3108	11999	112.586	64.587	444.55
2019-11-06_C1	many tracks	2581	11999	314.375	71.006	470.9
2019-11-06_C2	Track_8	344	346	110.694	167.599	0.1
2019-11-06_C2	Track_5	351	353	32.303	45.343	0.1
2019-11-06_C2	Track_12	546	548	106.813	108.474	0.1
2019-11-06_C2	Track_25	846	848	411.514	30.717	0.1
2019-11-06_C2	Track_28	895	897	208.995	95.601	0.1
2019-11-06_C2	Track_60	1453	1455	183.531	49.106	0.1
2019-11-06_C2	Track_92	1948	1950	49.049	121.154	0.1
2019-11-06_C2	Track_125	2482	2484	186.054	19.904	0.1
2019-11-06_C2	Track_126	2531	2533	11.924	12.859	0.1
2019-11-06_C2	Track_127	2546	2548	12.427	12.152	0.1
2019-11-06_C2	Track_134	2750	2752	93.921	177.117	0.1
2019-11-06_C2	Track_136	2764	2766	89.083	184.932	0.1
2019-11-06_C2	Track_151	3046	3048	182.389	15.588	0.1
2019-11-06_C2	Track_190	3592	3594	135.395	175.648	0.1
2019-11-06_C2	Track_242	4061	4063	268.995	26.263	0.1
2019-11-06_C2	Track_261	4242	4244	245.963	100.515	0.1
2019-11-06_C2	Track_331	4663	4665	404.028	249.794	0.1
2019-11-06_C2	Track_338	4698	4700	17.019	111.565	0.1
2019-11-06_C2	Track_408	5144	5146	42.568	11.097	0.1
2019-11-06_C2	Track_534	5910	5912	48.896	161.179	0.1
2019-11-06_C2	Track_570	6015	6017	213.024	162.886	0.1
2019-11-06_C2	Track_626	6170	6172	195.353	220.461	0.1
2019-11-06_C2	Track_614	6174	6176	44.8	205.406	0.1
2019-11-06_C2	Track_646	6275	6277	243.674	207.602	0.1
2019-11-06_C2	Track_806	6742	6744	105.326	128.468	0.1
2019-11-06_C2	Track_912	7043	7045	171.652	186.38	0.1
2019-11-06_C2	Track_1064	7488	7490	17.401	58.29	0.1
2019-11-06_C2	Track_1627	8377	8379	383.399	198.682	0.1
2019-11-06_C2	Track_1621	8411	8413	21.413	124.449	0.1
2019-11-06_C2	Track_1883	9004	9006	366.687	189.74	0.1
2019-11-06_C2	Track_2088	9421	9423	28.223	62.274	0.1
2019-11-06_C2	Track_2129	9502	9504	68.191	83.163	0.1
2019-11-06_C2	Track_2132	9503	9505	400.39	68.268	0.1
2019-11-06_C2	Track_2262	9756	9758	250.165	155.93	0.1
2019-11-06_C2	Track_2291	9820	9822	161.726	29.662	0.1
2019-11-06_C2	Track_2303	9842	9844	50.708	132.003	0.1
2019-11-06_C2	Track_2480	10246	10248	175.895	217.061	0.1
2019-11-06_C2	Track_2555	10393	10395	318.811	118.161	0.1
2019-11-06_C2	Track_2593	10458	10460	171.911	146.656	0.1
2019-11-06_C2	Track_2614	10479	10481	240.36	101.754	0.1
2019-11-06_C2	Track_2674	10625	10627	313.852	131.687	0.1
2019-11-06_C2	Track_2714	10704	10706	361.119	233.435	0.1
2019-11-06_C2	Track_2902	11101	11103	232.236	195.905	0.1
2019-11-06_C2	Track_2933	11178	11180	131.295	95.883	0.1
2019-11-06_C2	Track_3185	11727	11729	69.741	164.187	0.1
2019-11-06_C2	Track_3333	11965	11967	192.868	11.717	0.1
2019-11-06_C2	Track_3340	11966	11968	353.288	168.438	0.1
2019-11-06_C2	Track_967	7206	7209	68.437	160.443	0.15
2019-11-06_C2	Track_1596	8383	8386	207.145	242.563	0.15
2019-11-06_C2	Track_2043	9340	9343	58.2	89.712	0.15
2019-11-06_C2	Track_2761	10804	10807	245.992	160.04	0.15
2019-11-06_C2	Track_56	1325	1329	84.553	88.093	0.2
2019-11-06_C2	Track_158	3158	3162	420.578	226.572	0.2
2019-11-06_C2	Track_237	4012	4016	112.102	142.425	0.2
2019-11-06_C2	Track_273	4329	4333	285.199	50.816	0.2
2019-11-06_C2	Track_276	4340	4344	287.351	49.935	0.2
2019-11-06_C2	Track_1244	7872	7876	47.871	153.864	0.2
2019-11-06_C2	Track_1872	8969	8973	256.554	230.311	0.2
2019-11-06_C2	Track_2084	9413	9417	27.787	62.574	0.2
2019-11-06_C2	Track_3177	11707	11711	444.833	121.591	0.2
2019-11-06_C2	Track_6	352	357	417.029	67.878	0.25
2019-11-06_C2	Track_44	1192	1197	141.899	235.387	0.25
2019-11-06_C2	Track_350	4780	4785	265.059	246.705	0.25
2019-11-06_C2	Track_538	5927	5932	370.287	246.144	0.25
2019-11-06_C2	Track_640	6260	6265	238.994	221.368	0.25
2019-11-06_C2	Track_695	6428	6433	39.729	199.459	0.25
2019-11-06_C2	Track_807	6742	6747	285.744	12.107	0.25
2019-11-06_C2	Track_1101	7576	7581	275.563	159.879	0.25
2019-11-06_C2	Track_1862	8943	8949	266.41	230.939	0.3
2019-11-06_C2	Track_94	1996	2003	92.279	183.556	0.35
2019-11-06_C2	Track_2827	10905	10912	406.988	137.176	0.35
2019-11-06_C2	Track_163	3264	3272	403.018	233.448	0.4
2019-11-06_C2	Track_496	5653	5661	320.076	87.302	0.4
2019-11-06_C2	Track_2104	9453	9461	15.565	60.134	0.4
2019-11-06_C2	Track_27	886	896	410.967	49.789	0.5
2019-11-06_C2	Track_2075	9398	9408	28.274	62.487	0.5
2019-11-06_C2	Track_2620	10489	10499	174.046	120.156	0.5
2019-11-06_C2	Track_199	3668	3682	488.801	92.248	0.7
2019-11-06_C2	Track_485	5573	5588	307.462	176.362	0.75
2019-11-06_C2	Track_2355	9963	9979	113.947	14.39	0.8
2019-11-06_C2	Track_292	4417	4442	85.542	124.052	1.25
2019-11-06_C2	Track_155	3118	3144	387.006	236.117	1.3
2019-11-06_C2	many tracks	8688	8721	470.13	161.352	1.65
2019-11-06_C2	Track_517	5814	5864	365.703	168.128	2.5
2019-11-06_C2	many tracks	11540	11596	436.045	125.079	2.8
2019-11-06_C2	Track_797	6712	6775	367.273	118.915	3.15
2019-11-06_C2	many tracks	5943	6017	313.81	4.354	3.7
2019-11-06_C2	many tracks	4229	4315	289.241	50.558	4.3
2019-11-06_C2	Track_2060	9365	9494	251.886	228.102	6.45
2019-11-06_C2	many tracks	10430	10561	88.227	12.036	6.55
2019-11-06_C2	many tracks	8117	8503	490.25	53.758	19.3
2019-11-06_C2	many tracks	9084	11999	80.821	114.749	145.75
2019-11-06_C2	many tracks	8415	11999	421.06	131.311	179.2
2019-11-06_C2	Track_703	6453	11999	310.596	167.202	277.3
2019-11-06_C2	many tracks	5933	11999	148.377	235.429	303.3
2019-11-06_C2	many tracks	4554	11999	474.12	13.866	372.25
2019-11-06_C2	many tracks	4162	11999	493.74	10.399	391.85
2019-11-06_C2	many tracks	0	11999	130.227	30.423	599.95
2019-12-03_C1	Track_9	47	49	297.596	150.074	0.1
2019-12-03_C1	Track_38	365	367	125.653	165.901	0.1
2019-12-03_C1	Track_201	1208	1210	344.668	232.718	0.1
2019-12-03_C1	Track_225	1341	1343	203.712	206.451	0.1
2019-12-03_C1	Track_255	1471	1473	130.295	164.047	0.1
2019-12-03_C1	Track_280	1585	1587	234.146	138.718	0.1
2019-12-03_C1	Track_285	1602	1604	412.986	21.743	0.1
2019-12-03_C1	Track_404	1993	1995	351.554	87.223	0.1
2019-12-03_C1	Track_484	2240	2242	371.75	119.746	0.1
2019-12-03_C1	Track_705	2969	2971	89.274	24.727	0.1
2019-12-03_C1	Track_748	3132	3134	467.566	80.838	0.1
2019-12-03_C1	Track_751	3151	3153	62.343	214.974	0.1
2019-12-03_C1	Track_763	3173	3175	320.008	51.385	0.1
2019-12-03_C1	Track_849	3406	3408	35.335	123.859	0.1
2019-12-03_C1	Track_934	3663	3665	400.483	104.61	0.1
2019-12-03_C1	Track_989	3861	3863	240.266	130.789	0.1
2019-12-03_C1	Track_1000	3894	3896	149.288	91.893	0.1
2019-12-03_C1	Track_1223	4592	4594	204.409	131.125	0.1
2019-12-03_C1	Track_1238	4648	4650	259.314	199.952	0.1
2019-12-03_C1	Track_1298	4807	4809	245.72	132.693	0.1
2019-12-03_C1	Track_1305	4849	4851	448.283	177.932	0.1
2019-12-03_C1	Track_1365	5061	5063	140.118	228.715	0.1
2019-12-03_C1	Track_1510	5592	5594	431.968	72.095	0.1
2019-12-03_C1	Track_1521	5606	5608	243.971	86.026	0.1
2019-12-03_C1	Track_1655	6007	6009	318.232	171.26	0.1
2019-12-03_C1	Track_1771	6364	6366	284.125	67.61	0.1
2019-12-03_C1	Track_1800	6444	6446	253.282	56.46	0.1
2019-12-03_C1	Track_1825	6503	6505	459.538	67.125	0.1
2019-12-03_C1	Track_1836	6520	6522	98.09	99.128	0.1
2019-12-03_C1	Track_1992	6836	6838	107.038	80.715	0.1
2019-12-03_C1	Track_2206	7332	7334	393.606	27.597	0.1
2019-12-03_C1	Track_2242	7420	7422	286.964	39.613	0.1
2019-12-03_C1	Track_2402	7891	7893	330.713	26.752	0.1
2019-12-03_C1	Track_2450	8030	8032	340.881	70.623	0.1
2019-12-03_C1	Track_2478	8100	8102	489.847	227.56	0.1
2019-12-03_C1	Track_2485	8114	8116	315.804	194.366	0.1
2019-12-03_C1	Track_2583	8278	8280	282.485	245.361	0.1
2019-12-03_C1	Track_2619	8363	8365	125.02	252.761	0.1
2019-12-03_C1	Track_2698	8595	8597	176.406	152.142	0.1
2019-12-03_C1	Track_2761	8720	8722	11.716	42.86	0.1
2019-12-03_C1	Track_2787	8769	8771	303.082	52.264	0.1
2019-12-03_C1	Track_2907	9001	9003	111.996	128.992	0.1
2019-12-03_C1	Track_2923	9028	9030	159.992	11.268	0.1
2019-12-03_C1	Track_2928	9034	9036	298.66	34.727	0.1
2019-12-03_C1	Track_2968	9086	9088	25.653	115.296	0.1
2019-12-03_C1	Track_2969	9087	9089	168.301	58.797	0.1
2019-12-03_C1	Track_3021	9175	9177	228.135	55.222	0.1
2019-12-03_C1	Track_3374	9917	9919	279.326	131.043	0.1
2019-12-03_C1	Track_3638	10414	10416	115.436	122.497	0.1
2019-12-03_C1	Track_3760	10589	10591	198.142	72.792	0.1
2019-12-03_C1	Track_3792	10614	10616	5.227	176.79	0.1
2019-12-03_C1	Track_3778	10618	10620	186.913	115.364	0.1
2019-12-03_C1	Track_3895	10808	10810	440.244	203.712	0.1
2019-12-03_C1	Track_3954	10899	10901	87.158	245.803	0.1
2019-12-03_C1	Track_4113	11282	11284	112.89	154.861	0.1
2019-12-03_C1	Track_4271	11644	11646	5.24	205.161	0.1
2019-12-03_C1	Track_4273	11647	11649	504.51	221.865	0.1
2019-12-03_C1	Track_4348	11825	11827	99.308	227.98	0.1
2019-12-03_C1	Track_207	1271	1274	295.025	143.507	0.15
2019-12-03_C1	Track_322	1722	1725	386.136	197.052	0.15
2019-12-03_C1	Track_529	2423	2426	83.18	75.452	0.15
2019-12-03_C1	Track_564	2545	2548	358.966	9.374	0.15
2019-12-03_C1	Track_1167	4451	4454	63.787	141.93	0.15
2019-12-03_C1	Track_1192	4502	4505	227.482	141.144	0.15
2019-12-03_C1	Track_1199	4516	4519	222.803	128.963	0.15
2019-12-03_C1	Track_1377	5093	5096	230.529	145.258	0.15
2019-12-03_C1	Track_1564	5740	5743	428.126	218.074	0.15
2019-12-03_C1	Track_2790	8781	8784	183.889	131.781	0.15
2019-12-03_C1	Track_2997	9137	9140	256.138	169.21	0.15
2019-12-03_C1	Track_3023	9176	9179	412.512	98.262	0.15
2019-12-03_C1	Track_3422	10021	10024	6.725	200.533	0.15
2019-12-03_C1	Track_3929	10872	10875	213.662	208.462	0.15
2019-12-03_C1	Track_3027	9182	9185	417.23	98.961	0.15
2019-12-03_C1	Track_173	1094	1098	337.922	190.615	0.2
2019-12-03_C1	Track_219	1319	1323	429.733	166.102	0.2
2019-12-03_C1	Track_1347	5023	5027	462.002	37.523	0.2
2019-12-03_C1	Track_1447	5361	5365	465.454	251.152	0.2
2019-12-03_C1	Track_1794	6428	6432	326.458	165.619	0.2
2019-12-03_C1	Track_2580	8266	8270	218.104	158.293	0.2
2019-12-03_C1	Track_3054	9242	9246	482.796	47.541	0.2
2019-12-03_C1	Track_49	397	402	320.098	222.791	0.25
2019-12-03_C1	Track_159	1025	1030	57.912	166.734	0.25
2019-12-03_C1	Track_1522	5614	5619	244.222	87.965	0.25
2019-12-03_C1	Track_1390	5126	5132	150.836	234.508	0.3
2019-12-03_C1	Track_1839	6524	6530	185.624	72.069	0.3
2019-12-03_C1	Track_3157	9481	9490	223.743	66.275	0.45
2019-12-03_C1	many tracks	4628	4638	261.642	203.752	0.5
2019-12-03_C1	Track_144	941	953	40.006	158.871	0.6
2019-12-03_C1	many tracks	2961	2980	347.811	237.115	0.95
2019-12-03_C1	Track_2162	7226	7249	347.73	26.18	1.15
2019-12-03_C1	many tracks	4412	4510	247.666	211.054	4.9
2019-12-03_C1	Track_3144	9444	9574	500.935	90.557	6.5
2019-12-03_C1	Track_3029	9187	11999	415.217	98.731	140.6
2019-12-03_C1	many tracks	5761	11999	300.689	145.201	311.9
2019-12-03_C1	many tracks	5309	11999	130.357	150.466	334.5
2019-12-03_C1	Track_737	3097	11999	6.127	146.62	445.1
2019-12-03_C2	Track_7	227	229	121.393	79.669	0.1
2019-12-03_C2	Track_45	830	832	234.401	63.783	0.1
2019-12-03_C2	Track_82	1110	1112	209.436	62.029	0.1
2019-12-03_C2	Track_188	1654	1656	219.465	214.249	0.1
2019-12-03_C2	Track_312	2654	2656	41.526	72.064	0.1
2019-12-03_C2	Track_395	3158	3160	43.095	53.99	0.1
2019-12-03_C2	Track_547	3757	3759	47.439	54.376	0.1
2019-12-03_C2	Track_555	3819	3821	322.454	228.284	0.1
2019-12-03_C2	Track_570	3933	3935	413.933	183.07	0.1
2019-12-03_C2	Track_581	4014	4016	24.986	95.765	0.1
2019-12-03_C2	Track_620	4219	4221	82.913	123.244	0.1
2019-12-03_C2	Track_633	4308	4310	277.189	17.217	0.1
2019-12-03_C2	Track_646	4347	4349	129.377	209.6	0.1
2019-12-03_C2	Track_885	5277	5279	153.863	160.883	0.1
2019-12-03_C2	Track_908	5336	5338	421.089	33.35	0.1
2019-12-03_C2	Track_981	5570	5572	455.932	46.167	0.1
2019-12-03_C2	Track_1024	5674	5676	74.528	88.349	0.1
2019-12-03_C2	Track_1165	5987	5989	364.718	38.615	0.1
2019-12-03_C2	Track_1219	6118	6120	367.171	94.125	0.1
2019-12-03_C2	Track_1449	6655	6657	167.472	169.192	0.1
2019-12-03_C2	Track_1499	6759	6761	71.039	149.755	0.1
2019-12-03_C2	Track_1510	6784	6786	76.322	144.837	0.1
2019-12-03_C2	Track_1522	6812	6814	459.207	90.916	0.1
2019-12-03_C2	Track_1678	7202	7204	279.858	51.362	0.1
2019-12-03_C2	Track_2115	8071	8073	393.885	7.343	0.1
2019-12-03_C2	Track_2132	8112	8114	201.757	54.592	0.1
2019-12-03_C2	Track_2153	8136	8138	315.435	112.195	0.1
2019-12-03_C2	Track_2221	8216	8218	138.901	180.964	0.1
2019-12-03_C2	Track_2231	8282	8284	259.909	217.464	0.1
2019-12-03_C2	Track_2240	8307	8309	176.674	178.671	0.1
2019-12-03_C2	Track_2312	8454	8456	221.871	166.195	0.1
2019-12-03_C2	Track_2363	8544	8546	353.975	7.792	0.1
2019-12-03_C2	Track_2475	8772	8774	136.463	41.907	0.1
2019-12-03_C2	Track_2772	9542	9544	505.643	118.89	0.1
2019-12-03_C2	Track_2785	9559	9561	29.014	189.392	0.1
2019-12-03_C2	Track_2958	9904	9906	260.416	183.239	0.1
2019-12-03_C2	Track_3048	10059	10061	159.049	134.128	0.1
2019-12-03_C2	Track_3133	10214	10216	413.883	107.254	0.1
2019-12-03_C2	Track_3163	10284	10286	369.447	216.731	0.1
2019-12-03_C2	Track_3165	10289	10291	207.685	130.79	0.1
2019-12-03_C2	Track_3238	10441	10443	53.366	213.772	0.1
2019-12-03_C2	Track_3395	10808	10810	123.93	7.384	0.1
2019-12-03_C2	Track_3464	11030	11032	239.644	240.05	0.1
2019-12-03_C2	Track_3465	11032	11034	244.07	105.784	0.1
2019-12-03_C2	Track_3478	11067	11069	395.936	60.714	0.1
2019-12-03_C2	Track_3561	11271	11273	231.096	125.387	0.1
2019-12-03_C2	Track_3617	11427	11429	83.173	206.593	0.1
2019-12-03_C2	Track_3677	11576	11578	110.111	189.042	0.1
2019-12-03_C2	Track_3724	11684	11686	11.892	145.43	0.1
2019-12-03_C2	Track_32	652	655	67.314	140.648	0.15
2019-12-03_C2	Track_202	1706	1709	209.649	101.572	0.15
2019-12-03_C2	Track_235	1882	1885	283.75	199.751	0.15
2019-12-03_C2	Track_644	4343	4346	403.15	94.762	0.15
2019-12-03_C2	Track_862	5197	5200	173.274	29.599	0.15
2019-12-03_C2	Track_1436	6636	6639	307.825	180.834	0.15
2019-12-03_C2	Track_2662	9278	9281	193.194	156.643	0.15
2019-12-03_C2	Track_3288	10516	10519	82.737	141.79	0.15
2019-12-03_C2	Track_3334	10612	10615	182.15	89.8	0.15
2019-12-03_C2	Track_3575	11302	11305	218.258	169.94	0.15
2019-12-03_C2	Track_3680	11581	11584	104.094	187.125	0.15
2019-12-03_C2	Track_1	131	135	452.906	7.777	0.2
2019-12-03_C2	Track_65	979	983	7.681	61.074	0.2
2019-12-03_C2	Track_1073	5778	5782	60.623	129.076	0.2
2019-12-03_C2	Track_3140	10229	10233	204.601	194.47	0.2
2019-12-03_C2	Track_3189	10330	10334	225.956	217.769	0.2
2019-12-03_C2	Track_3233	10437	10441	216.436	36.142	0.2
2019-12-03_C2	Track_918	5377	5382	234.879	215.797	0.25
2019-12-03_C2	Track_2767	9528	9533	48.498	190.729	0.25
2019-12-03_C2	Track_2494	8836	8842	70.301	198.508	0.3
2019-12-03_C2	Track_3026	10016	10022	50.158	242.224	0.3
2019-12-03_C2	Track_325	2786	2793	122.839	176.119	0.35
2019-12-03_C2	Track_2218	8244	8251	30.113	239.337	0.35
2019-12-03_C2	Track_2502	8849	8856	80.464	195.975	0.35
2019-12-03_C2	Track_42	811	819	28.299	159.186	0.4
2019-12-03_C2	Track_1062	5751	5760	96.067	47.491	0.45
2019-12-03_C2	Track_23	512	525	132.645	139.026	0.65
2019-12-03_C2	Track_71	1041	1055	56.71	73.996	0.7
2019-12-03_C2	many tracks	4322	4340	401.227	89.116	0.9
2019-12-03_C2	Track_93	1154	1179	51.118	58.303	1.25
2019-12-03_C2	Track_190	1662	1690	208.599	97.19	1.4
2019-12-03_C2	Track_1135	5923	5954	67.77	163.419	1.55
2019-12-03_C2	Track_3150	10240	10280	208.445	193.106	2
2019-12-03_C2	Track_2071	7991	8042	303.244	120.155	2.55
2019-12-03_C2	many tracks	11165	11225	428.797	145.116	3
2019-12-03_C2	Track_548	3801	3862	459.574	163.044	3.05
2019-12-03_C2	many tracks	1460	1524	158.04	78.605	3.2
2019-12-03_C2	Track_698	4559	4686	182.634	128.202	6.35
2019-12-03_C2	many tracks	3192	3322	419.209	179.732	6.5
2019-12-03_C2	many tracks	11236	11372	427.422	146.839	6.8
2019-12-03_C2	many tracks	526	687	129.529	138.025	8.05
2019-12-03_C2	many tracks	3819	4027	453.697	152.223	10.4
2019-12-03_C2	many tracks	10641	10942	19.404	232.904	15.05
2019-12-03_C2	many tracks	5067	8656	114.067	243.776	179.45
2019-12-03_C2	Track_595	4078	11999	271.636	80.128	396.05
2019-12-03_C2	many tracks	4019	11999	506.216	186.902	399
2019-12-03_C2	many tracks	2209	11999	181.662	8.192	489.5
2019-12-03_C2	many tracks	2177	11999	10.574	2.421	491.1
Track data for the interaction of 100 nm full corona particles interacting with lipid bilayers
experiment id	Track label	Start frame	Stop frame	y position (avg)	x position (avg)	Track duration (s)
2019-10-30_C4	Track_0	16	18	95.407	167.633	0.1
2019-10-30_C4	Track_15	47	49	152.361	140.972	0.1
2019-10-30_C4	Track_20	54	56	115.37	232.524	0.1
2019-10-30_C4	Track_22	159	161	300.996	119.966	0.1
2019-10-30_C4	Track_39	385	387	103.619	139.185	0.1
2019-10-30_C4	Track_50	430	432	391.116	62.395	0.1
2019-10-30_C4	Track_55	477	479	315.065	248.881	0.1
2019-10-30_C4	Track_69	626	628	163.451	200.786	0.1
2019-10-30_C4	Track_92	926	928	33.609	220.153	0.1
2019-10-30_C4	Track_93	936	938	133.216	104.35	0.1
2019-10-30_C4	Track_107	1096	1098	74.495	63.354	0.1
2019-10-30_C4	Track_111	1104	1106	159.586	249.194	0.1
2019-10-30_C4	Track_112	1105	1107	74.027	54.009	0.1
2019-10-30_C4	Track_122	1154	1156	322.006	105.14	0.1
2019-10-30_C4	Track_153	1399	1401	328.745	89.101	0.1
2019-10-30_C4	Track_162	1605	1607	193.16	204.57	0.1
2019-10-30_C4	Track_165	1668	1670	230.959	206.777	0.1
2019-10-30_C4	Track_232	2255	2257	303.915	246.463	0.1
2019-10-30_C4	Track_241	2361	2363	4.942	168.183	0.1
2019-10-30_C4	Track_281	2659	2661	248.557	83.816	0.1
2019-10-30_C4	Track_289	2700	2702	438.515	18.513	0.1
2019-10-30_C4	Track_306	2930	2932	286.822	240.715	0.1
2019-10-30_C4	Track_339	3323	3325	326.836	28.128	0.1
2019-10-30_C4	Track_354	3363	3365	328.578	45.025	0.1
2019-10-30_C4	Track_352	3410	3412	316.606	91.397	0.1
2019-10-30_C4	Track_359	3412	3414	101.039	244.348	0.1
2019-10-30_C4	Track_376	3589	3591	51.885	149.233	0.1
2019-10-30_C4	Track_383	3643	3645	230.035	144.509	0.1
2019-10-30_C4	Track_384	3644	3646	328.189	227.356	0.1
2019-10-30_C4	Track_387	3662	3664	375.298	71.78	0.1
2019-10-30_C4	Track_390	3719	3721	452.222	72.005	0.1
2019-10-30_C4	Track_391	3722	3724	318.2	205.608	0.1
2019-10-30_C4	Track_417	3992	3994	232.755	231.698	0.1
2019-10-30_C4	Track_431	4065	4067	94.042	60.02	0.1
2019-10-30_C4	Track_465	4199	4201	289.756	176.844	0.1
2019-10-30_C4	Track_495	4423	4425	106.66	161.208	0.1
2019-10-30_C4	Track_528	4784	4786	152.368	116.401	0.1
2019-10-30_C4	Track_549	4997	4999	410.321	46.94	0.1
2019-10-30_C4	Track_557	5052	5054	281.862	186.782	0.1
2019-10-30_C4	Track_576	5256	5258	6.405	146.053	0.1
2019-10-30_C4	Track_587	5320	5322	85.979	94.78	0.1
2019-10-30_C4	Track_588	5323	5325	84.28	93.26	0.1
2019-10-30_C4	Track_624	5548	5550	295.416	181.974	0.1
2019-10-30_C4	Track_631	5614	5616	380.751	227.215	0.1
2019-10-30_C4	Track_650	5712	5714	381.893	183.057	0.1
2019-10-30_C4	Track_689	6147	6149	173.032	14.534	0.1
2019-10-30_C4	Track_725	6419	6421	200.026	57.684	0.1
2019-10-30_C4	Track_736	6491	6493	182.333	89.971	0.1
2019-10-30_C4	Track_755	6646	6648	294.728	22.321	0.1
2019-10-30_C4	Track_757	6654	6656	43.151	209.878	0.1
2019-10-30_C4	Track_759	6658	6660	299.438	23.047	0.1
2019-10-30_C4	Track_773	6761	6763	259.713	228.76	0.1
2019-10-30_C4	Track_788	6819	6821	232.448	63.957	0.1
2019-10-30_C4	Track_784	6876	6878	226.946	81.093	0.1
2019-10-30_C4	Track_803	7012	7014	7.324	181.718	0.1
2019-10-30_C4	Track_826	7190	7192	306.712	165.186	0.1
2019-10-30_C4	Track_828	7197	7199	241.115	84.887	0.1
2019-10-30_C4	Track_848	7475	7477	33.368	165.64	0.1
2019-10-30_C4	Track_889	8019	8021	329.479	191.86	0.1
2019-10-30_C4	Track_916	8359	8361	261.284	71.544	0.1
2019-10-30_C4	Track_1004	9343	9345	448.459	57.465	0.1
2019-10-30_C4	Track_1009	9407	9409	161.346	18.674	0.1
2019-10-30_C4	Track_1017	9417	9419	360.08	125.876	0.1
2019-10-30_C4	Track_1024	9498	9500	355.098	86.006	0.1
2019-10-30_C4	Track_1063	9858	9860	140.526	113.021	0.1
2019-10-30_C4	Track_1078	9976	9978	268.795	154.966	0.1
2019-10-30_C4	Track_1081	10040	10042	423.739	139.753	0.1
2019-10-30_C4	Track_1098	10225	10227	148.257	73.018	0.1
2019-10-30_C4	Track_1125	10357	10359	97.726	87.78	0.1
2019-10-30_C4	Track_1139	10523	10525	146.729	251.354	0.1
2019-10-30_C4	Track_1159	10672	10674	281.754	37.376	0.1
2019-10-30_C4	Track_1190	10869	10871	460.136	96.15	0.1
2019-10-30_C4	Track_1201	10958	10960	221.483	26.258	0.1
2019-10-30_C4	Track_1202	10970	10972	144.47	144.57	0.1
2019-10-30_C4	Track_1204	11001	11003	329.548	40.11	0.1
2019-10-30_C4	Track_1269	11508	11510	78.392	69.759	0.1
2019-10-30_C4	Track_1270	11514	11516	335.995	176.843	0.1
2019-10-30_C4	Track_1298	11725	11727	128.844	153.485	0.1
2019-10-30_C4	Track_1294	11752	11754	170.665	56.711	0.1
2019-10-30_C4	Track_137	1233	1236	192.925	132.886	0.15
2019-10-30_C4	Track_148	1352	1355	380.49	139.386	0.15
2019-10-30_C4	Track_199	2016	2019	169.836	116.529	0.15
2019-10-30_C4	Track_208	2039	2042	192.887	66.818	0.15
2019-10-30_C4	Track_251	2404	2407	232.251	168.193	0.15
2019-10-30_C4	Track_275	2639	2642	375.958	232.798	0.15
2019-10-30_C4	Track_394	3760	3763	132.224	252.064	0.15
2019-10-30_C4	Track_729	6429	6432	160.289	94.776	0.15
2019-10-30_C4	Track_752	6611	6614	142.274	77.211	0.15
2019-10-30_C4	Track_846	7410	7413	332.804	138.311	0.15
2019-10-30_C4	Track_911	8330	8333	92.481	206.277	0.15
2019-10-30_C4	Track_1005	9344	9347	323.758	43.015	0.15
2019-10-30_C4	Track_1040	9630	9633	139.914	88.736	0.15
2019-10-30_C4	Track_447	4143	4147	124.448	188.848	0.2
2019-10-30_C4	many tracks	5225	5229	44.873	90.714	0.2
2019-10-30_C4	Track_698	6246	6251	169.954	73.989	0.25
2019-10-30_C4	Track_810	7029	7034	155.781	37.379	0.25
2019-10-30_C4	Track_363	3463	3469	298.712	20.611	0.3
2019-10-30_C4	Track_959	8806	8813	141.726	194.554	0.35
2019-10-30_C4	many tracks	8047	11999	206.974	185.572	197.6
2019-10-30_C5	Track_6	186	188	92.444	244.896	0.1
2019-10-30_C5	Track_7	186	188	117.854	71.713	0.1
2019-10-30_C5	Track_19	365	367	11.442	134.163	0.1
2019-10-30_C5	Track_57	1086	1088	177.5	231.006	0.1
2019-10-30_C5	Track_69	1212	1214	104.155	179.953	0.1
2019-10-30_C5	Track_81	1469	1471	206.592	224.945	0.1
2019-10-30_C5	Track_114	1722	1724	3.898	89.562	0.1
2019-10-30_C5	Track_174	2286	2288	333.906	52.734	0.1
2019-10-30_C5	Track_179	2502	2504	43.963	56.319	0.1
2019-10-30_C5	Track_226	2998	3000	242.998	203.611	0.1
2019-10-30_C5	Track_246	3247	3249	433.164	60.838	0.1
2019-10-30_C5	Track_282	3742	3744	437.342	207.813	0.1
2019-10-30_C5	Track_338	4353	4355	51.772	173.415	0.1
2019-10-30_C5	Track_356	4533	4535	60.03	138.889	0.1
2019-10-30_C5	Track_380	4914	4916	192.736	219.138	0.1
2019-10-30_C5	Track_391	4934	4936	246.75	221.386	0.1
2019-10-30_C5	Track_442	5745	5747	229.996	115.697	0.1
2019-10-30_C5	Track_448	5845	5847	432.758	91.196	0.1
2019-10-30_C5	Track_495	6498	6500	86.379	77.584	0.1
2019-10-30_C5	Track_502	6617	6619	168.237	222.244	0.1
2019-10-30_C5	Track_515	6817	6819	277.357	114.765	0.1
2019-10-30_C5	Track_518	6849	6851	265.433	65.528	0.1
2019-10-30_C5	Track_530	6992	6994	140.932	154.344	0.1
2019-10-30_C5	Track_547	7194	7196	212.067	159.473	0.1
2019-10-30_C5	Track_567	7469	7471	202.008	116.946	0.1
2019-10-30_C5	Track_605	7923	7925	206.881	174.356	0.1
2019-10-30_C5	Track_611	7987	7989	105.69	27.589	0.1
2019-10-30_C5	Track_622	8121	8123	86.483	145.907	0.1
2019-10-30_C5	Track_632	8344	8346	160.144	70.649	0.1
2019-10-30_C5	Track_650	8536	8538	85.903	123.453	0.1
2019-10-30_C5	Track_656	8698	8700	157.473	246.156	0.1
2019-10-30_C5	Track_693	9311	9313	135.755	158.924	0.1
2019-10-30_C5	Track_756	9938	9940	111.716	22.353	0.1
2019-10-30_C5	Track_755	10008	10010	144.617	49.535	0.1
2019-10-30_C5	Track_766	10192	10194	168.665	45.851	0.1
2019-10-30_C5	Track_787	10461	10463	143.884	154.682	0.1
2019-10-30_C5	Track_791	10597	10599	295.689	56.455	0.1
2019-10-30_C5	Track_799	10672	10674	192.634	252.518	0.1
2019-10-30_C5	Track_824	10961	10963	171.702	121.607	0.1
2019-10-30_C5	Track_838	11136	11138	41.837	17.706	0.1
2019-10-30_C5	Track_855	11353	11355	113.047	226.877	0.1
2019-10-30_C5	Track_863	11467	11469	75.747	132.833	0.1
2019-10-30_C5	Track_910	11898	11900	325.393	67.515	0.1
2019-10-30_C5	Track_105	1661	1664	43.32	43.552	0.15
2019-10-30_C5	Track_168	2420	2423	125.34	71.459	0.15
2019-10-30_C5	Track_241	3190	3193	69.431	209.749	0.15
2019-10-30_C5	Track_281	3729	3732	488.908	100.264	0.15
2019-10-30_C5	Track_286	3810	3813	110.629	194.675	0.15
2019-10-30_C5	Track_640	8497	8500	303.397	195.683	0.15
2019-10-30_C5	Track_704	9463	9466	351.111	130.098	0.15
2019-10-30_C5	Track_712	9514	9517	158.059	248.909	0.15
2019-10-30_C5	Track_760	10142	10145	69.973	164.682	0.15
2019-10-30_C5	Track_11	231	235	263.671	160.721	0.2
2019-10-30_C5	Track_113	1706	1710	161.916	255.943	0.2
2019-10-30_C5	Track_486	6246	6250	56.097	125.258	0.2
2019-10-30_C5	Track_710	9497	9501	367.723	81.427	0.2
2019-10-30_C5	Track_772	10288	10292	284.445	28.775	0.2
2019-10-30_C5	Track_371	4662	4667	178.724	33.633	0.25
2019-10-30_C5	Track_427	5497	5502	25.595	92.784	0.25
2019-10-30_C5	Track_56	1071	1077	494.721	28.333	0.3
2019-11-26_C1	Track_0	31	33	82.726	70.459	0.1
2019-11-26_C1	Track_11	102	104	12.63	134.014	0.1
2019-11-26_C1	Track_23	144	146	92.107	175.275	0.1
2019-11-26_C1	Track_59	480	482	6.042	142.445	0.1
2019-11-26_C1	Track_79	592	594	471.204	6.882	0.1
2019-11-26_C1	Track_76	594	596	27.148	238.23	0.1
2019-11-26_C1	Track_83	621	623	18.226	234.723	0.1
2019-11-26_C1	Track_86	632	634	327.913	239.343	0.1
2019-11-26_C1	Track_113	785	787	317.679	72.732	0.1
2019-11-26_C1	Track_114	800	802	291.621	251.29	0.1
2019-11-26_C1	Track_130	863	865	150.07	49.778	0.1
2019-11-26_C1	Track_136	906	908	165.225	219.043	0.1
2019-11-26_C1	Track_159	1012	1014	41.648	110.314	0.1
2019-11-26_C1	Track_164	1071	1073	375.991	45.271	0.1
2019-11-26_C1	Track_192	1212	1214	350.967	36.916	0.1
2019-11-26_C1	Track_199	1244	1246	433.818	118.228	0.1
2019-11-26_C1	Track_202	1252	1254	228.299	221.542	0.1
2019-11-26_C1	Track_207	1305	1307	343.744	35.591	0.1
2019-11-26_C1	Track_221	1400	1402	192.942	187.587	0.1
2019-11-26_C1	Track_256	1677	1679	240.473	237.063	0.1
2019-11-26_C1	Track_271	1897	1899	32.218	153.031	0.1
2019-11-26_C1	Track_291	2116	2118	372.991	214.937	0.1
2019-11-26_C1	Track_299	2144	2146	298.869	222.378	0.1
2019-11-26_C1	Track_304	2227	2229	378.231	117.304	0.1
2019-11-26_C1	Track_309	2252	2254	62.33	184.849	0.1
2019-11-26_C1	Track_332	2458	2460	393.616	115.884	0.1
2019-11-26_C1	Track_345	2601	2603	421.024	73.99	0.1
2019-11-26_C1	Track_359	2671	2673	178.963	192.637	0.1
2019-11-26_C1	Track_382	2852	2854	2.919	18.377	0.1
2019-11-26_C1	Track_469	3390	3392	275.913	192.95	0.1
2019-11-26_C1	Track_499	3623	3625	101.95	129.896	0.1
2019-11-26_C1	Track_511	3700	3702	197.193	237.03	0.1
2019-11-26_C1	Track_510	3700	3702	293.921	48.444	0.1
2019-11-26_C1	Track_548	3945	3947	109.358	166.189	0.1
2019-11-26_C1	Track_553	3988	3990	120.234	141.362	0.1
2019-11-26_C1	Track_577	4129	4131	234.154	35.213	0.1
2019-11-26_C1	Track_592	4214	4216	363.39	117.403	0.1
2019-11-26_C1	Track_600	4281	4283	240.539	140.594	0.1
2019-11-26_C1	Track_602	4285	4287	114.206	39.485	0.1
2019-11-26_C1	Track_605	4290	4292	89.587	98.625	0.1
2019-11-26_C1	Track_653	4461	4463	284.009	32.068	0.1
2019-11-26_C1	Track_660	4490	4492	199.99	135.812	0.1
2019-11-26_C1	Track_665	4504	4506	315.767	29.248	0.1
2019-11-26_C1	Track_673	4547	4549	184.725	218.975	0.1
2019-11-26_C1	Track_675	4558	4560	90.445	21.905	0.1
2019-11-26_C1	Track_676	4561	4563	90.461	6.237	0.1
2019-11-26_C1	Track_678	4565	4567	199.549	188.591	0.1
2019-11-26_C1	Track_686	4581	4583	90.076	51.417	0.1
2019-11-26_C1	Track_703	4670	4672	177.657	211.864	0.1
2019-11-26_C1	Track_711	4742	4744	89.301	8.804	0.1
2019-11-26_C1	Track_712	4743	4745	433.747	157.12	0.1
2019-11-26_C1	Track_720	4787	4789	366.746	206.527	0.1
2019-11-26_C1	Track_726	4813	4815	193.648	101.297	0.1
2019-11-26_C1	Track_748	4937	4939	180.164	99.591	0.1
2019-11-26_C1	Track_754	4947	4949	183.146	103.529	0.1
2019-11-26_C1	Track_789	5122	5124	84.802	213.641	0.1
2019-11-26_C1	Track_801	5183	5185	34.044	181.923	0.1
2019-11-26_C1	Track_823	5268	5270	402.718	46.911	0.1
2019-11-26_C1	Track_833	5306	5308	43.841	183.705	0.1
2019-11-26_C1	Track_854	5451	5453	50.862	204.135	0.1
2019-11-26_C1	Track_919	5978	5980	210.376	209.062	0.1
2019-11-26_C1	Track_945	6089	6091	121.574	160.684	0.1
2019-11-26_C1	Track_952	6112	6114	212.293	197.116	0.1
2019-11-26_C1	Track_978	6324	6326	424.024	99.936	0.1
2019-11-26_C1	Track_981	6380	6382	151.243	85.329	0.1
2019-11-26_C1	Track_986	6475	6477	236.798	127.609	0.1
2019-11-26_C1	Track_987	6477	6479	122.292	114.923	0.1
2019-11-26_C1	Track_993	6503	6505	198.772	118.385	0.1
2019-11-26_C1	Track_1018	6665	6667	111.474	106.674	0.1
2019-11-26_C1	Track_1019	6670	6672	110.205	108.265	0.1
2019-11-26_C1	Track_1039	6752	6754	122.522	118.234	0.1
2019-11-26_C1	Track_1046	6767	6769	110.534	99.8	0.1
2019-11-26_C1	Track_1048	6778	6780	133.621	117.038	0.1
2019-11-26_C1	Track_1052	6804	6806	130.274	125.603	0.1
2019-11-26_C1	Track_1057	6818	6820	129.981	126.896	0.1
2019-11-26_C1	Track_1078	6898	6900	497.113	16.154	0.1
2019-11-26_C1	Track_1129	7407	7409	147.897	41.374	0.1
2019-11-26_C1	Track_1131	7458	7460	393.731	158.1	0.1
2019-11-26_C1	Track_1135	7481	7483	10.096	85.512	0.1
2019-11-26_C1	Track_1152	7625	7627	168.499	41.513	0.1
2019-11-26_C1	Track_1160	7666	7668	59.503	19.255	0.1
2019-11-26_C1	Track_1180	7774	7776	27.676	120.806	0.1
2019-11-26_C1	Track_1200	7901	7903	75.547	44.162	0.1
2019-11-26_C1	Track_1222	7976	7978	343.159	137.467	0.1
2019-11-26_C1	Track_1241	8073	8075	13.09	111.89	0.1
2019-11-26_C1	Track_1259	8178	8180	237.064	99.706	0.1
2019-11-26_C1	Track_1297	8425	8427	388.756	227.212	0.1
2019-11-26_C1	Track_1302	8500	8502	301.681	136.543	0.1
2019-11-26_C1	Track_1303	8524	8526	75.799	141.07	0.1
2019-11-26_C1	Track_1314	8579	8581	113.467	117.835	0.1
2019-11-26_C1	Track_1323	8636	8638	178.18	213.274	0.1
2019-11-26_C1	Track_1329	8677	8679	102.105	107.87	0.1
2019-11-26_C1	Track_1350	8748	8750	312.379	235.052	0.1
2019-11-26_C1	Track_1357	8790	8792	69.972	162.585	0.1
2019-11-26_C1	Track_1379	8948	8950	267.961	87.033	0.1
2019-11-26_C1	Track_1452	9270	9272	182.686	76.005	0.1
2019-11-26_C1	Track_1464	9331	9333	326.543	50.125	0.1
2019-11-26_C1	Track_1497	9539	9541	213.451	86.97	0.1
2019-11-26_C1	Track_1506	9566	9568	60.351	120.613	0.1
2019-11-26_C1	Track_1522	9632	9634	16.556	110.332	0.1
2019-11-26_C1	Track_1533	9680	9682	12.185	102.315	0.1
2019-11-26_C1	Track_1548	9723	9725	242.707	118.229	0.1
2019-11-26_C1	Track_1553	9774	9776	34.311	134.84	0.1
2019-11-26_C1	Track_1564	9841	9843	359.442	225.933	0.1
2019-11-26_C1	Track_1575	9879	9881	444.254	71.582	0.1
2019-11-26_C1	Track_1602	9977	9979	371.565	174.384	0.1
2019-11-26_C1	Track_1598	9991	9993	26.793	205.159	0.1
2019-11-26_C1	Track_1609	10062	10064	286.802	157.973	0.1
2019-11-26_C1	Track_1613	10073	10075	63.3	186.804	0.1
2019-11-26_C1	Track_1615	10102	10104	54.707	194.905	0.1
2019-11-26_C1	Track_1616	10102	10104	318.21	250.005	0.1
2019-11-26_C1	Track_1635	10172	10174	65.126	203.613	0.1
2019-11-26_C1	Track_1668	10331	10333	222.422	167.005	0.1
2019-11-26_C1	Track_1671	10345	10347	193.292	204.32	0.1
2019-11-26_C1	Track_1674	10363	10365	75.146	89.959	0.1
2019-11-26_C1	Track_1744	10956	10958	156.747	156.374	0.1
2019-11-26_C1	Track_1771	11282	11284	438.956	214.813	0.1
2019-11-26_C1	Track_1778	11327	11329	135.206	140.712	0.1
2019-11-26_C1	Track_1780	11346	11348	406.974	186.176	0.1
2019-11-26_C1	Track_1789	11405	11407	392.943	192.581	0.1
2019-11-26_C1	Track_1800	11475	11477	52.619	250.761	0.1
2019-11-26_C1	Track_1819	11631	11633	341.483	100.27	0.1
2019-11-26_C1	Track_1826	11716	11718	271.025	115.384	0.1
2019-11-26_C1	Track_1836	11862	11864	22.641	127.028	0.1
2019-11-26_C1	Track_1847	11906	11908	314.411	150.227	0.1
2019-11-26_C1	Track_1851	11954	11956	232.807	199.844	0.1
2019-11-26_C1	Track_1858	11991	11993	189.123	30.804	0.1
2019-11-26_C1	Track_5	22	25	88.211	61.834	0.15
2019-11-26_C1	Track_158	1004	1007	246.095	97.157	0.15
2019-11-26_C1	Track_168	1082	1085	268.199	174.113	0.15
2019-11-26_C1	Track_341	2555	2558	92.119	138.323	0.15
2019-11-26_C1	Track_386	2894	2897	10.142	17.984	0.15
2019-11-26_C1	Track_412	3129	3132	357.198	252.131	0.15
2019-11-26_C1	Track_423	3145	3148	298.656	55.005	0.15
2019-11-26_C1	Track_475	3491	3494	435.705	17.15	0.15
2019-11-26_C1	Track_648	4429	4432	287.436	41.9	0.15
2019-11-26_C1	Track_674	4556	4559	94.924	8.699	0.15
2019-11-26_C1	Track_699	4651	4654	188.358	135.471	0.15
2019-11-26_C1	Track_739	4854	4857	68.993	18.949	0.15
2019-11-26_C1	Track_785	5096	5099	376.586	51.776	0.15
2019-11-26_C1	Track_861	5516	5519	39.783	36.893	0.15
2019-11-26_C1	Track_876	5699	5702	122.664	49.355	0.15
2019-11-26_C1	Track_968	6199	6202	76.129	196.154	0.15
2019-11-26_C1	Track_1103	7275	7278	333.581	29.91	0.15
2019-11-26_C1	Track_1326	8663	8666	110.329	109.602	0.15
2019-11-26_C1	Track_1378	8940	8943	258.231	86.714	0.15
2019-11-26_C1	Track_1469	9406	9409	160.661	65.008	0.15
2019-11-26_C1	Track_1484	9484	9487	95.21	124.348	0.15
2019-11-26_C1	Track_1540	9733	9736	421.732	6.814	0.15
2019-11-26_C1	Track_1601	10002	10005	424.2	65.174	0.15
2019-11-26_C1	Track_1656	10270	10273	115.877	132.02	0.15
2019-11-26_C1	Track_1731	10871	10874	147.769	157.577	0.15
2019-11-26_C1	Track_1747	11006	11009	57.688	69.393	0.15
2019-11-26_C1	Track_46	384	388	166.483	24.605	0.2
2019-11-26_C1	Track_229	1405	1409	198.941	129.43	0.2
2019-11-26_C1	Track_272	1898	1902	48.255	193.959	0.2
2019-11-26_C1	Track_627	4369	4373	281.827	29.14	0.2
2019-11-26_C1	Track_811	5236	5240	233.34	6.445	0.2
2019-11-26_C1	Track_899	5887	5891	281.704	185.636	0.2
2019-11-26_C1	Track_1100	7265	7269	279.677	42.086	0.2
2019-11-26_C1	Track_1159	7660	7664	62.17	21.328	0.2
2019-11-26_C1	Track_1501	9552	9556	78.037	124.628	0.2
2019-11-26_C1	Track_1554	9774	9778	235.687	245.666	0.2
2019-11-26_C1	Track_1700	10592	10596	55.998	123.031	0.2
2019-11-26_C1	Track_172	1111	1116	27.989	156.691	0.25
2019-11-26_C1	many tracks	2275	2280	391.435	131.651	0.25
2019-11-26_C1	Track_446	3290	3295	233.85	191.063	0.25
2019-11-26_C1	Track_564	4076	4081	389.217	76.861	0.25
2019-11-26_C1	Track_626	4352	4357	288.199	16.503	0.25
2019-11-26_C1	Track_872	5643	5648	77.681	195.357	0.25
2019-11-26_C1	Track_914	5941	5946	120.05	12.629	0.25
2019-11-26_C1	Track_1003	6558	6563	427.993	108.929	0.25
2019-11-26_C1	Track_1413	9118	9123	188.546	88.943	0.25
2019-11-26_C1	Track_1661	10310	10315	329.464	151.484	0.25
2019-11-26_C1	Track_99	700	706	322.782	241.829	0.3
2019-11-26_C1	Track_143	921	927	286.002	78.565	0.3
2019-11-26_C1	Track_1067	6847	6856	145.728	130.485	0.45
2019-11-26_C1	Track_1722	10793	10805	151.243	157.965	0.6
2019-11-26_C1	many tracks	4336	4349	382.805	43.14	0.65
2019-11-26_C1	Track_1446	9280	9294	192.54	64.588	0.7
2019-11-26_C1	Track_214	1346	11999	260.985	142.039	532.65
2020-01-22-C1	Track_2	26	28	393.188	18.767	0.1
2020-01-22-C1	Track_129	596	598	450.648	117.717	0.1
2020-01-22-C1	Track_131	606	608	239.452	50.731	0.1
2020-01-22-C1	Track_133	610	612	316.898	130.52	0.1
2020-01-22-C1	Track_199	1068	1070	281.727	106.775	0.1
2020-01-22-C1	Track_215	1207	1209	258.333	244.658	0.1
2020-01-22-C1	Track_217	1220	1222	238.501	191.528	0.1
2020-01-22-C1	Track_225	1336	1338	82.64	101.738	0.1
2020-01-22-C1	Track_235	1407	1409	73.023	46.801	0.1
2020-01-22-C1	Track_264	1575	1577	373.611	144.386	0.1
2020-01-22-C1	Track_272	1597	1599	92.253	58.118	0.1
2020-01-22-C1	Track_280	1633	1635	8.927	230.414	0.1
2020-01-22-C1	Track_330	1978	1980	246.87	140.694	0.1
2020-01-22-C1	Track_347	2030	2032	425.876	109.473	0.1
2020-01-22-C1	Track_351	2093	2095	376.886	99.487	0.1
2020-01-22-C1	Track_356	2136	2138	77.829	138.719	0.1
2020-01-22-C1	Track_359	2158	2160	380.233	93.258	0.1
2020-01-22-C1	Track_368	2234	2236	430.567	66.778	0.1
2020-01-22-C1	Track_374	2312	2314	166.465	180.387	0.1
2020-01-22-C1	Track_401	2462	2464	139.45	178.154	0.1
2020-01-22-C1	Track_410	2568	2570	233.121	93.242	0.1
2020-01-22-C1	Track_415	2641	2643	320.904	121.98	0.1
2020-01-22-C1	Track_450	2945	2947	246.785	55.058	0.1
2020-01-22-C1	Track_455	3024	3026	112.318	129.968	0.1
2020-01-22-C1	Track_469	3121	3123	264.676	26.455	0.1
2020-01-22-C1	Track_470	3124	3126	24.547	243.997	0.1
2020-01-22-C1	Track_476	3170	3172	50.785	63.653	0.1
2020-01-22-C1	Track_486	3307	3309	282.923	13.612	0.1
2020-01-22-C1	Track_505	3440	3442	313.44	42.524	0.1
2020-01-22-C1	Track_535	3781	3783	53.556	237.277	0.1
2020-01-22-C1	Track_540	3822	3824	51.593	228.061	0.1
2020-01-22-C1	Track_558	3938	3940	362.613	89.843	0.1
2020-01-22-C1	Track_583	4061	4063	348.076	104.774	0.1
2020-01-22-C1	Track_607	4184	4186	360.326	15.559	0.1
2020-01-22-C1	Track_600	4186	4188	457.902	211.57	0.1
2020-01-22-C1	Track_605	4238	4240	80.932	157.834	0.1
2020-01-22-C1	Track_630	4403	4405	367.362	41.637	0.1
2020-01-22-C1	Track_635	4423	4425	349.388	206.292	0.1
2020-01-22-C1	Track_674	4720	4722	185.694	19.976	0.1
2020-01-22-C1	Track_685	4799	4801	336.172	146.384	0.1
2020-01-22-C1	Track_695	4867	4869	380.092	239.092	0.1
2020-01-22-C1	Track_711	4962	4964	293.812	93.668	0.1
2020-01-22-C1	Track_720	5005	5007	355.232	47.14	0.1
2020-01-22-C1	Track_730	5117	5119	103.442	201.849	0.1
2020-01-22-C1	Track_731	5127	5129	383.359	154.635	0.1
2020-01-22-C1	Track_750	5243	5245	275.19	100.607	0.1
2020-01-22-C1	Track_761	5294	5296	45.415	153.042	0.1
2020-01-22-C1	Track_754	5324	5326	78.447	118.875	0.1
2020-01-22-C1	Track_776	5574	5576	365.758	146.824	0.1
2020-01-22-C1	Track_796	5748	5750	302.015	91.077	0.1
2020-01-22-C1	Track_797	5750	5752	293.854	170.979	0.1
2020-01-22-C1	Track_816	5905	5907	195.541	131.468	0.1
2020-01-22-C1	Track_833	6004	6006	45.42	199.712	0.1
2020-01-22-C1	Track_834	6009	6011	186.665	151.229	0.1
[truncated: 3,014 more rows]
